# Supplementary material for: Cobalt catalysed reduction of CO2viahydroboration
Source: Royal Society of Chemistry journal article supplement (doi:10.1039/c8dt01985a), 2018-01-01
Supplement: c8dt01985a1.pdf [file c8dt01985a1.pdf]

## Supporting Information

Cobalt catalyzed hydroboration of CO<sub>2</sub>

Sem Raj Tamang, and Michael Findlater\*

Department of Chemistry & Biochemistry, Texas Tech University, Lubbock, TX 79401

Corresponding author email: [Michael.Findlater@ttu.edu](mailto:Michael.Findlater@ttu.edu)

### Contents

|                                                                                                                                                                                                                                          |     |
|------------------------------------------------------------------------------------------------------------------------------------------------------------------------------------------------------------------------------------------|-----|
| General Considerations.....                                                                                                                                                                                                              | S3  |
| General procedure for hydroboration of CO <sub>2</sub> with HBPin.....                                                                                                                                                                   | S3  |
| General procedure for hydroboration of CO <sub>2</sub> with HBCat.....                                                                                                                                                                   | S4  |
| General procedure for hydroboration of CO <sub>2</sub> with BH <sub>3</sub> •S(Me) <sub>2</sub> .....                                                                                                                                    | S4  |
| <br>                                                                                                                                                                                                                                     |     |
| <b>Figure S 1</b> <sup>11</sup> B NMR spectra for hydroboration of CO <sub>2</sub> with 10 mol % Co(acac) <sub>3</sub> , 10 mol % NaHBET <sub>3</sub> , and HBPin (1.0 mmol) at various time intervals in THF.....                       | S5  |
| <b>Figure S 2</b> <sup>11</sup> B NMR for hydroboration of CO <sub>2</sub> using 10 mol % Co(acac) <sub>3</sub> , and HBPin (1.0 mmol) in THF.....                                                                                       | S6  |
| <b>Figure S 3</b> <sup>11</sup> B NMR spectra for hydroboration of CO <sub>2</sub> with 10 mol % NaHBET <sub>3</sub> , and HBpin (1.0 mmol) at various time intervals in THF- <i>d</i> <sub>8</sub> .....                                | S7  |
| <b>Figure S 4</b> <sup>1</sup> H NMR spectra for hydroboration of CO <sub>2</sub> with 10 mol % NaHBET <sub>3</sub> , and HBpin (1.0 mmol) at various time intervals in THF- <i>d</i> <sub>8</sub> .....                                 | S8  |
| <b>Figure S 5</b> <sup>1</sup> H NMR spectra for hydroboration of CO <sub>2</sub> with 1 mol % Co(acac) <sub>3</sub> , 1 mol % NaHBET <sub>3</sub> , and HBPin (0.1 mmol) at various time intervals THF- <i>d</i> <sub>8</sub> .....     | S9  |
| <b>Figure S 6</b> <sup>11</sup> B NMR spectra for hydroboration of CO <sub>2</sub> with 1 mol % Co(acac) <sub>3</sub> , 1 mol % NaHBET <sub>3</sub> , and HBPin (0.1 mmol) at various time intervals in THF- <i>d</i> <sub>8</sub> ..... | S10 |
| <b>Figure S 7</b> <sup>13</sup> C NMR spectra after hydroboration of CO <sub>2</sub> with 1 mol % Co(acac) <sub>3</sub> , 1 mol % NaHBET <sub>3</sub> , and HBpin (0.1 mmol) in THF- <i>d</i> <sub>8</sub> .....                         | S11 |
| <b>Figure S 8</b> <sup>11</sup> B NMR spectra for hydroboration of CO <sub>2</sub> with 1 mol % NaHBET <sub>3</sub> , and HBpin (0.1 mmol) at various time intervals THF- <i>d</i> <sub>8</sub> .....                                    | S12 |
| <b>Figure S 9</b> <sup>1</sup> H NMR spectra for hydroboration of CO <sub>2</sub> with 1 mol % NaHBET <sub>3</sub> , and HBpin (0.1 mmol) at various time intervals in THF- <i>d</i> <sub>8</sub> .....                                  | S13 |
| <b>Figure S 10</b> <sup>11</sup> B NMR spectra for hydroboration of CO <sub>2</sub> with and HBpin (0.1 mmol) in the absence of Co(acac) <sub>3</sub> and NaHBET <sub>3</sub> at various time intervals THF- <i>d</i> <sub>8</sub> ..... | S14 |
| <b>Figure S 11</b> <sup>1</sup> H NMR spectra for hydroboration of CO <sub>2</sub> with and HBpin (0.1 mmol) in the absence of Co(acac) <sub>3</sub> and NaHBET <sub>3</sub> at various time intervals THF- <i>d</i> <sub>8</sub> .....  | S15 |
| <b>Figure S 12</b> <sup>13</sup> C NMR after hydroboration of CO <sub>2</sub> with HBpin (0.1mmol) in the absence of Co(acac) <sub>3</sub> and NaHBET <sub>3</sub> THF- <i>d</i> <sub>8</sub> .....                                      | S16 |
| <b>Figure S 13</b> <sup>11</sup> B NMR spectra for hydroboration of CO <sub>2</sub> with 1 mol % CoBr <sub>2</sub> , 1 mol % NaHBET <sub>3</sub> , and HBPin (0.1 mmol) at various time intervals in THF- <i>d</i> <sub>8</sub> .....    | S17 |

|                                                                                                                                                                                                                                                                 |     |
|-----------------------------------------------------------------------------------------------------------------------------------------------------------------------------------------------------------------------------------------------------------------|-----|
| <b>Figure S 14</b> $^{11}\text{B}$ NMR spectra for hydroboration of $\text{CO}_2$ with 1 mol % $\text{Co}(\text{acac})_2$ , 1 mol % $\text{NaHBET}_3$ , and $\text{HBPIn}$ (0.1 mmol) at various time intervals in $\text{THF-}d_8$ .....                       | S18 |
| <b>Figure S 15</b> $^{11}\text{B}$ NMR spectra for hydroboration of $\text{CO}_2$ with 1 mol % $\text{Co}(\text{II})$ Benzoate, 1 mol % $\text{NaHBET}_3$ , and $\text{HBPIn}$ (0.1 mmol) at various time intervals in $\text{THF-}d_8$ .....                   | S19 |
| <b>Figure S 16</b> $^{11}\text{B}$ NMR spectra for hydroboration of $\text{CO}_2$ with 1 mol % $\text{Co}(\text{TMHD})_3$ , 1 mol % $\text{NaHBET}_3$ , and $\text{HBPIn}$ (0.1 mmol) at various time intervals in $\text{THF-}d_8$ .....                       | S20 |
| <b>Figure S 17</b> $^{11}\text{B}$ NMR spectra for hydroboration of $\text{CO}_2$ with 1 mol % $\text{Co}(\text{acac})_3$ , 1 mol % $\text{NaHBET}_3$ , and $\text{HBPIn}$ (0.1 mmol) at various time intervals in Toluene- $d_8$ .....                         | S21 |
| <b>Figure S 18</b> $^{11}\text{B}$ NMR spectra for hydroboration of $\text{CO}_2$ with 1 mol % $\text{Co}(\text{acac})_3$ , 1 mol % $\text{NaHBET}_3$ , and $\text{HBPIn}$ (0.1 mmol) at various time intervals in benzene- $d_6$ .....                         | S22 |
| <b>Figure S 19</b> $^{11}\text{B}$ NMR spectra for hydroboration of $\text{CO}_2$ with 1 mol % $\text{Co}(\text{acac})_3$ , 1 mol % $\text{NaHBET}_3$ , and $\text{HBPIn}$ (0.1 mmol) at various time intervals in $\text{CD}_2\text{Cl}_2$ - $d_2$ .....       | S23 |
| <b>Figure S 20</b> $^{11}\text{B}$ NMR spectra for hydroboration of $\text{CO}_2$ with 1 mol % $\text{Co}(\text{acac})_3$ , 1 mol % $\text{NaHBET}_3$ , and $\text{HBPIn}$ (0.1 mmol) at various time intervals in $\text{CDCl}_3$ .....                        | S24 |
| <b>Figure S 21</b> $^{11}\text{B}$ NMR spectra for hydroboration of $\text{CO}_2$ with 1 mol % $\text{Co}(\text{acac})_3$ , 1 mol % $\text{NaHBET}_3$ , and $\text{HBPIn}$ (0.1 mmol) at various time intervals in cyclohexane- $d_{12}$ .....                  | S25 |
| <b>Figure S 22</b> $^1\text{H}$ NMR spectra for hydroboration of $\text{CO}_2$ with 1 mol % $\text{Co}(\text{acac})_3$ , 1 mol % $\text{NaHBET}_3$ , and $\text{BH}_3\cdot\text{S}(\text{Me})_2$ (0.1 mmol) at various time intervals in $\text{THF-}d_8$ ..... | S26 |
| <b>Figure S 23</b> $^{11}\text{B}$ NMR spectra for hydroboration of $\text{CO}_2$ with 1 mol % $\text{Co}(\text{acac})_3$ , 1 mol % $\text{NaHBET}_3$ , and $\text{BH}_3\cdot\text{S}(\text{Me})_2$ (0.1 mmol) at various time intervals $\text{THF-}d_8$ ..... | S27 |
| <b>Figure S 24</b> $^{13}\text{C}$ NMR spectra after hydroboration of $\text{CO}_2$ with 1 mol % $\text{Co}(\text{acac})_3$ , 1 mol % $\text{NaHBET}_3$ , and $\text{BH}_3\cdot\text{S}(\text{Me})_2$ (0.1 mmol) in $\text{THF-}d_8$ .....                      | S28 |
| <b>Figure S 25</b> $^1\text{H}$ NMR spectra in $\text{THF-}d_8$ after hydrolysis with 50 $\mu\text{L}$ of $\text{DCL}$ in $\text{D}_2\text{O}$ .....                                                                                                            | S29 |
| <b>Figure S 26</b> $^{11}\text{B}$ NMR spectra for hydroboration of $\text{CO}_2$ with 1 mol % $\text{NaHBET}_3$ , and $\text{BH}_3\cdot\text{S}(\text{Me})_2$ (0.1 mmol) at various time intervals in $\text{THF}$ .....                                       | S30 |
| <b>Figure S 27</b> $^1\text{H}$ NMR spectra for hydroboration of $\text{CO}_2$ with 1 mol % $\text{Co}(\text{acac})_3$ , 1 mol % $\text{NaHBET}_3$ , and $\text{HBCat}$ (0.1 mmol) at various time intervals in $\text{THF-}d_8$ .....                          | S31 |
| <b>Figure S 28</b> $^{11}\text{B}$ NMR spectra for hydroboration of $\text{CO}_2$ with 1 mol % $\text{Co}(\text{acac})_3$ , 1 mol % $\text{NaHBET}_3$ , $\text{HBCat}$ (0.1 mmol) and $\text{CO}_2$ at various time intervals in $\text{THF-}d_8$ .....         | S32 |
| <b>Figure S 29</b> $^{11}\text{B}$ NMR spectra for hydroboration of $\text{CO}_2$ with 1 mol % $\text{Co}(\text{acac})_3$ , 1 mol % $\text{NaHBET}_3$ , $\text{HBCat}$ (0.1 mmol) and $\text{CO}_2$ at various time intervals in $\text{THF-}d_8$ .....         | S33 |
| <b>Figure S 30</b> $^{11}\text{B}$ NMR spectra for hydroboration of $\text{CO}_2$ with 10 mol % $\text{Co}(\text{acac})_3$ , 10 mol % $\text{NaHBET}_3$ , and $\text{B}_2\text{Pin}_2$ (1.0 mmol) at various time intervals in $\text{THF}$ .....               | S34 |

**General Considerations.** All reagents were purchased from Sigma-Aldrich and Alfa-Aesar, and were used without further purification unless otherwise noted. All preparations were performed under an atmosphere of dry argon using Schlenk and glove box techniques unless otherwise noted. Solvents (Benzene-*d*<sub>6</sub>, Toluene-*d*<sub>8</sub>) were dried over activated molecular sieves (4Å) prior to usage; THF-*d*<sub>8</sub> was dried and distilled over CaH<sub>2</sub>. <sup>1</sup>H, <sup>11</sup>B, and <sup>13</sup>C NMR spectra were recorded on a Jeol 400 MHz spectrometer at 300K unless otherwise noted. <sup>1</sup>H NMR spectra were referenced to the solvent residual peak (THF-*d*<sub>8</sub>, δ 3.58 ppm, Benzene-*d*<sub>6</sub>, δ 7.16 ppm, Toluene-*d*<sub>8</sub>, δ 2.08, Cyclohexane-*d*<sub>12</sub>, δ 1.38 ppm, Dichloromethane-*d*<sub>2</sub>, δ 5.32 ppm and Chloroform-*d* δ 7.26 ppm. <sup>13</sup>C NMR were referenced to the solvent residual peak (THF-*d*<sub>8</sub>, δ 67.21 ppm). <sup>11</sup>B NMR were referenced to BF<sub>3</sub>·(OEt)<sub>2</sub> as external standard: HBPIn (THF-*d*<sub>8</sub>, δ 27.34 ppm and δ 28.7 ppm), HBCat (THF-*d*<sub>8</sub>, δ 23.7 ppm and δ 25.1 ppm), BH<sub>3</sub>·S(Me)<sub>2</sub> (THF-*d*<sub>8</sub>, δ - 21.3 ppm), B<sub>2</sub>Pin<sub>2</sub> (THF-*d*<sub>8</sub>, δ 31.3 ppm).

### General procedure for hydroboration of CO<sub>2</sub> with HBPIn

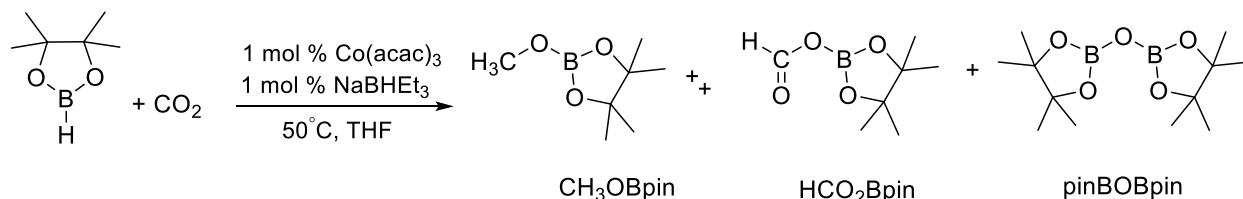

A pre-weighed oven dried shell vial was charged with 1 mol % Co(acac)<sub>3</sub> (0.356 mg, 0.001 mmol). It was dissolved in 0.4 mL THF-*d*<sub>8</sub>, and transferred to an oven dried J-Young tube. 1 mol % NaBHET<sub>3</sub> (1 μL, 0.001 mmol, 1M in THF) was added and the reaction mixture turned into a clear light yellow solution after stirring for 1 minute. A separate pre-weighed vial was charged with HBPIn (12.8 mg, 0.1 mmol) and dissolved in THF- *d*<sub>8</sub> (0.3 mL); it was then transferred to the J-Young tube containing the reaction mixture. The reaction mixture was degassed by three cycles of freeze-pump-thaw, and backfilled with CO<sub>2</sub> for ~ 2 minutes. The J-Young NMR tube was then placed in a pre-heated oil bath at 50°C. The progress of the reaction was monitored by <sup>1</sup>H and <sup>11</sup>B over time. <sup>1</sup>H NMR yield was determined by adding mesitylene as internal standard.

HCO<sub>2</sub>Bpin: <sup>1</sup>H NMR (400 MHz, THF- *d*<sub>8</sub>): δ 8.29 (s, HCO<sub>2</sub>Bpin); <sup>11</sup>B NMR (128.4 MHz, THF- *d*<sub>8</sub>): δ 21.7 (s, br); <sup>13</sup>C NMR (100 MHz, THF- *d*<sub>8</sub>): δ 159 ppm, 84.5 ppm.

pinBOBpin: <sup>1</sup>H NMR (400 MHz, THF- *d*<sub>8</sub>): 1.18 (s, 24H); <sup>11</sup>B NMR (128.4 MHz, THF- *d*<sub>8</sub>): δ 21.2 (s, br); <sup>13</sup>C NMR(100 MHz, THF- *d*<sub>8</sub>): δ 83.15 ppm.

CH<sub>3</sub>OBpin: <sup>1</sup>H NMR (400 MHz, THF- *d*<sub>8</sub>): 3.50 (s, CH<sub>3</sub>OBpin); <sup>11</sup>B NMR (128.4 MHz, THF- *d*<sub>8</sub>): δ 22.03 (s, br).

## General procedure for hydroboration of CO<sub>2</sub> with HBCat

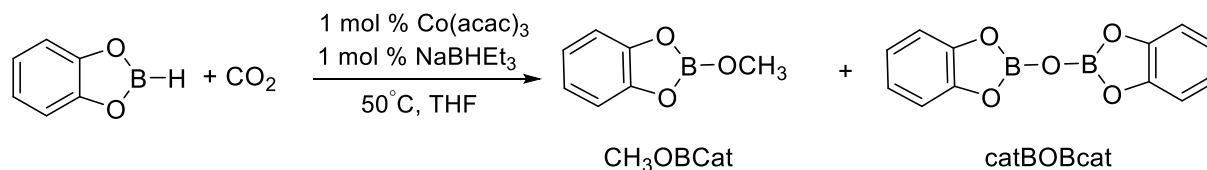

A pre-weighed oven dried shell vial was charged with 1 mol % Co(acac)<sub>3</sub> (0.356 mg, 0.001 mmol). It was dissolved in 0.4 mL THF-*d*<sub>8</sub>, and transferred to an oven dried J-Young tube. 1 mol % NaHBEt<sub>3</sub> (1 μL, 0.001 mmol, 1M in THF) was added and the reaction mixture turned into a clear light yellow solution after stirring for 1 minute. A separate pre-weighed vial was charged with HBCat (11.99 mg, 0.1 mmol) and dissolved in THF- *d*<sub>8</sub> (0.3 mL); it was then transferred to the J-Young tube containing the reaction mixture. The reaction mixture was degassed by three cycles of freeze-pump-thaw, and backfilled with CO<sub>2</sub> for ~ 2 minutes. The J-Young NMR tube was then placed in a pre-heated oil bath at 50°C. The progress of the reaction was monitored by <sup>1</sup>H and <sup>11</sup>B over time. <sup>1</sup>H NMR yield was determined by adding mesitylene as internal standard.

CH<sub>3</sub>OBCat: <sup>1</sup>H NMR (400 MHz, THF- *d*<sub>8</sub>): 3.78 (s, CH<sub>3</sub>OBCat); <sup>11</sup>B NMR (128.4 MHz, THF- *d*<sub>8</sub>): δ 23.4 (s, br); <sup>13</sup>C NMR (100 MHz, THF- *d*<sub>8</sub>): δ 53.3 ppm

CatBOBCat: <sup>11</sup>B NMR (128.4 MHz, THF- *d*<sub>8</sub>): δ 17.7 (s, br); <sup>13</sup>C NMR (100 MHz, THF- *d*<sub>8</sub>): δ 150.2

## General procedure for hydroboration of CO<sub>2</sub> with BH<sub>3</sub>•S(Me)<sub>2</sub>

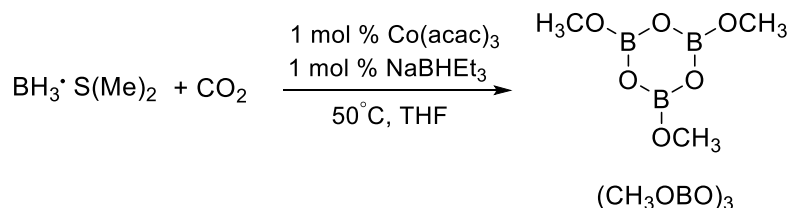

A pre-weighed oven dried shell vial was charged with 1 mol % Co(acac)<sub>3</sub> (0.356 mg, 0.001 mmol). It was dissolved in 0.4 mL THF-*d*<sub>8</sub>, and transferred to an oven dried J-Young tube. 1 mol % NaHBEt<sub>3</sub> (1 μL, 0.001 mmol, 1M in THF) was added and the reaction mixture turned into a clear light yellow solution after stirring for 1 minute. A separate pre-weighed vial was charged with BH<sub>3</sub>•S(Me)<sub>2</sub> (7.60 mg, 0.1 mmol) and dissolved in THF- *d*<sub>8</sub> (0.3 mL); it was then transferred to the J-Young tube containing the reaction mixture. The reaction mixture was degassed by three cycles of freeze-pump-thaw, and backfilled with CO<sub>2</sub> for ~ 2 minutes. The J-Young NMR tube was then placed in a pre-heated oil bath at 50°C. The progress of the reaction was monitored by <sup>1</sup>H and <sup>11</sup>B over time. <sup>1</sup>H NMR yield was determined by adding mesitylene as internal standard.

(CH<sub>3</sub>OBO)<sub>3</sub>: <sup>1</sup>H NMR (400 MHz, THF-*d*<sub>8</sub>): δ 3.54, (s, (CH<sub>3</sub>OBO)<sub>3</sub>), <sup>11</sup>B NMR (128.4 MHz, THF-*d*<sub>8</sub>): δ 19.3 ppm (s, br). <sup>13</sup>C NMR (100 MHz, THF-*d*<sub>8</sub>): δ 51.3 ppm.

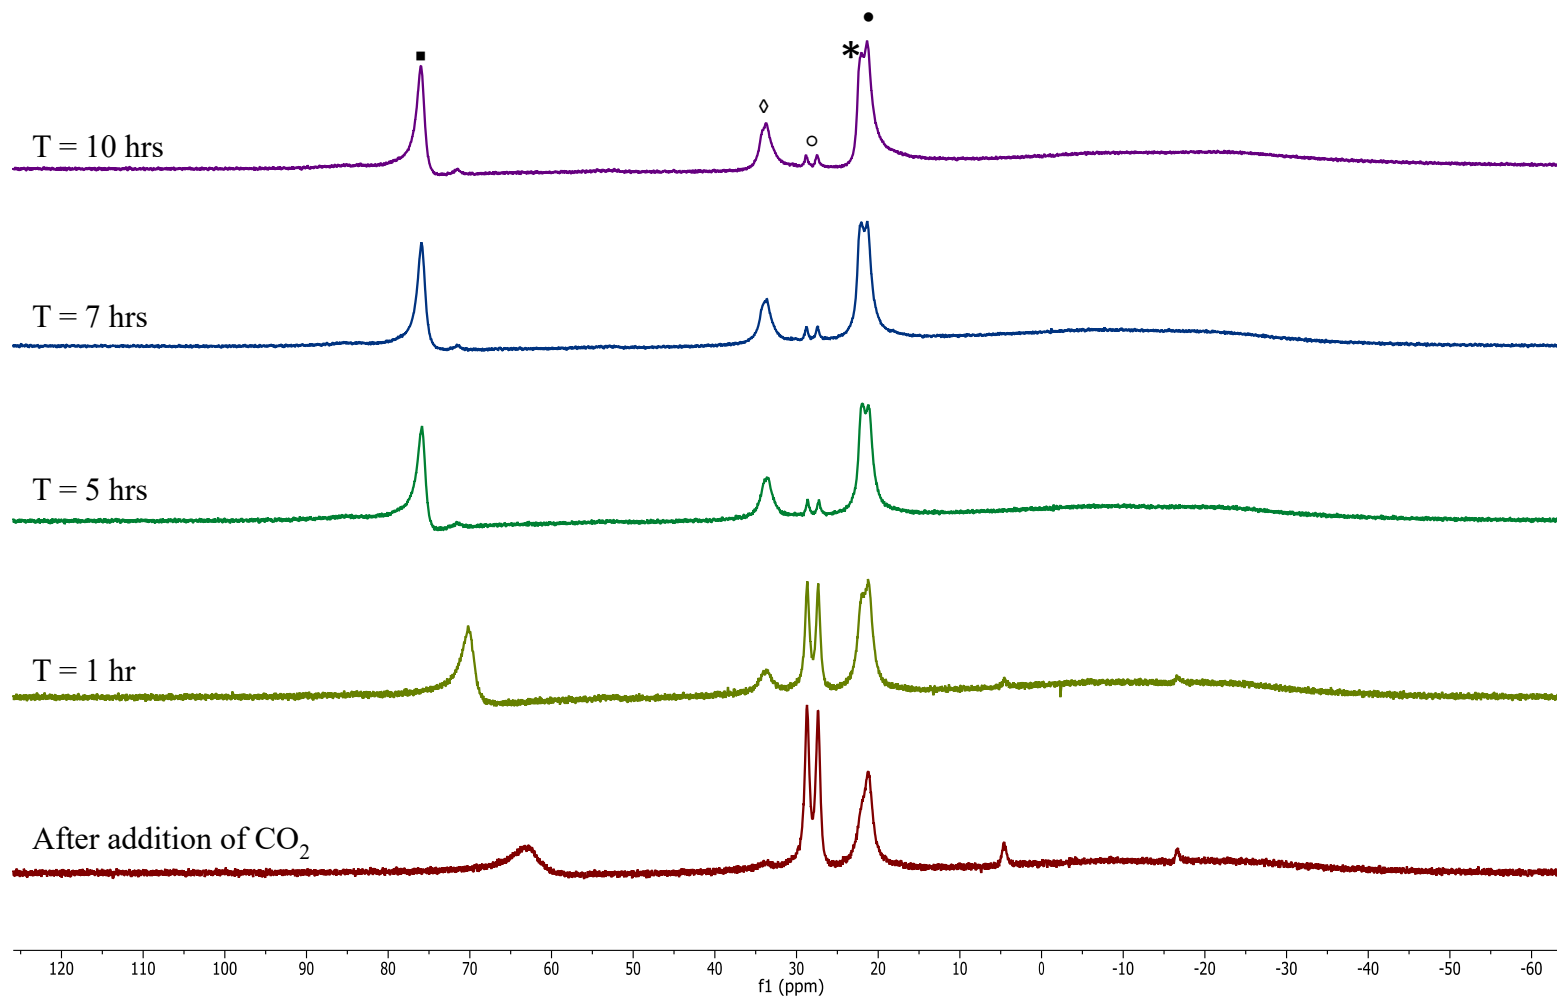

**Figure S 1**  $^{11}\text{B}$  NMR spectra for hydroboration of  $\text{CO}_2$  with 10 mol %  $\text{Co}(\text{acac})_3$ , 10 mol %  $\text{NaHBEt}_3$ , and HBPIn (1.0 mmol) at various time intervals in THF. (■) represents the  $^{11}\text{B}$  peak for  $\text{BEt}_3$  at 76 ppm, (\*) represents the peak for  $\text{CH}_3\text{OBPin}$  at 22.03 ppm, (●) represents the peak for pinBOBpin at 21.2 ppm, (○) represents the peak for unreacted HBpin at 27.3 ppm and 28.7 ppm and (◇) represents the peak for unidentified boron species.

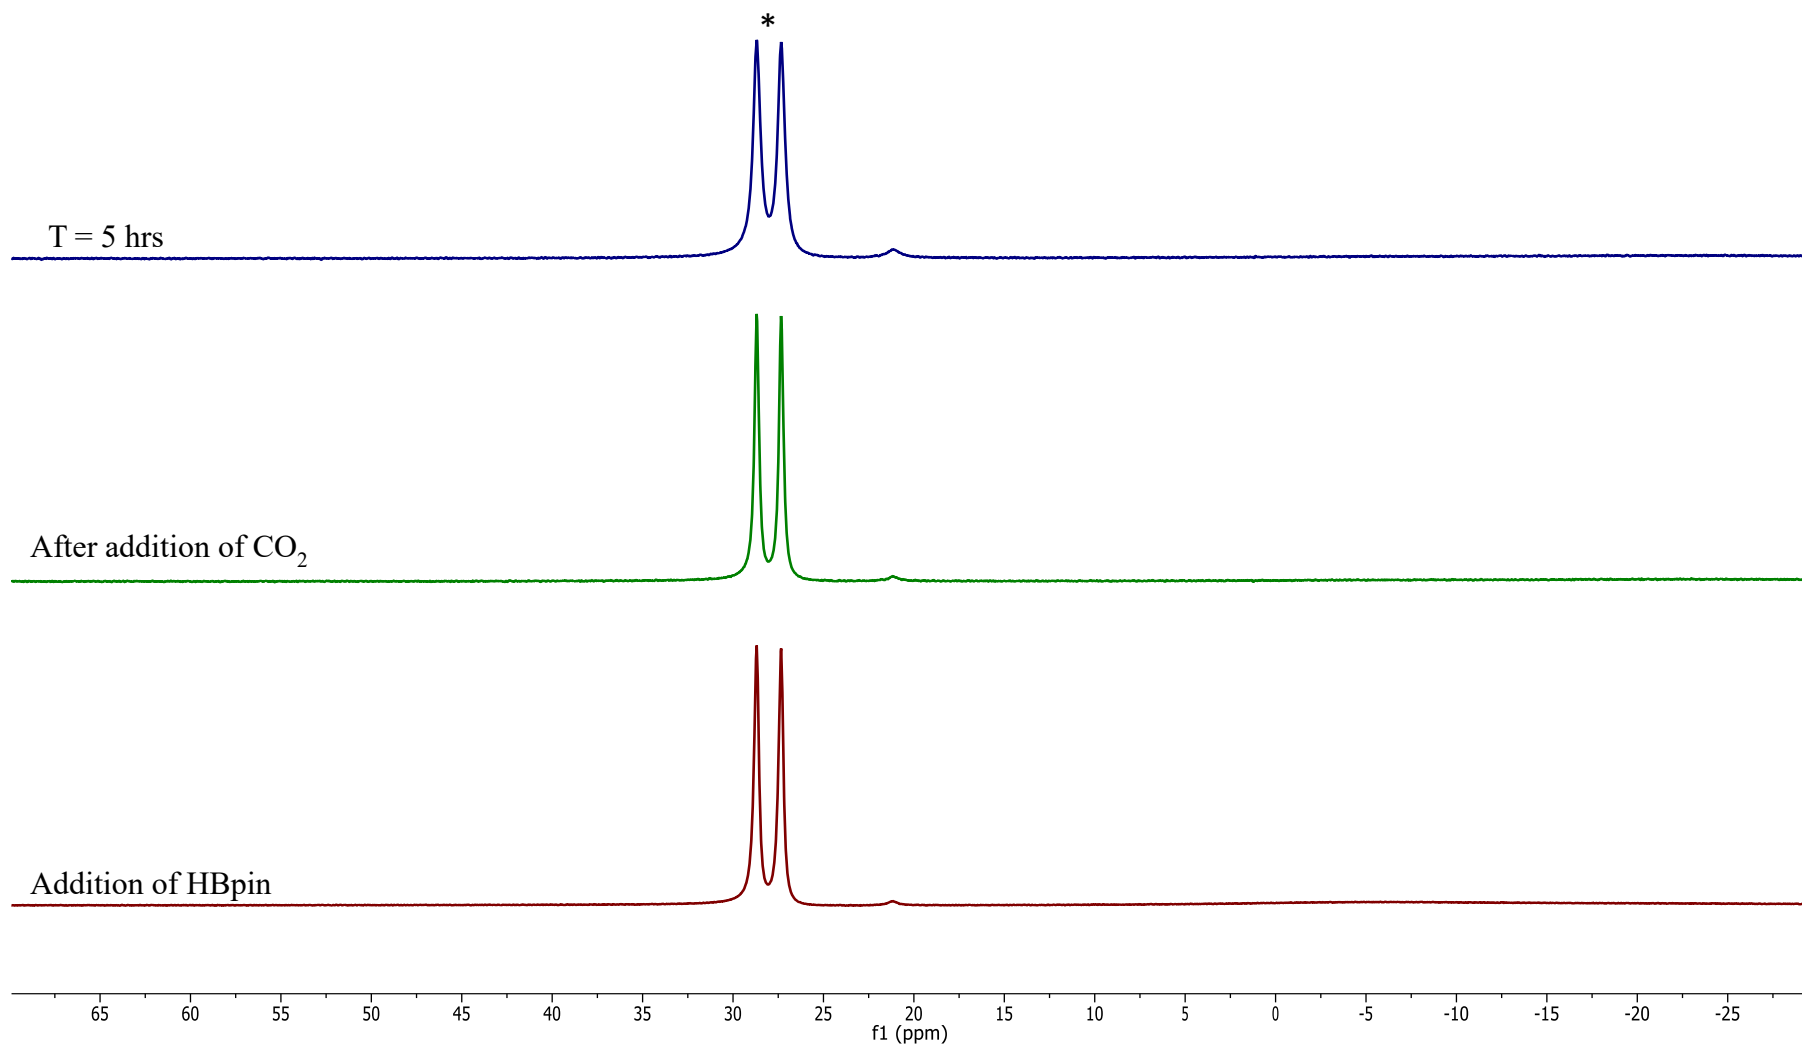

**Figure S 2**  $^{11}\text{B}$  NMR for hydroboration of  $\text{CO}_2$  using 10 mol %  $\text{Co}(\text{acac})_3$ , and HBPin (1.0 mmol) in THF. (\*) represents the peak for HBpin at 27.34 ppm and 28.7 ppm.

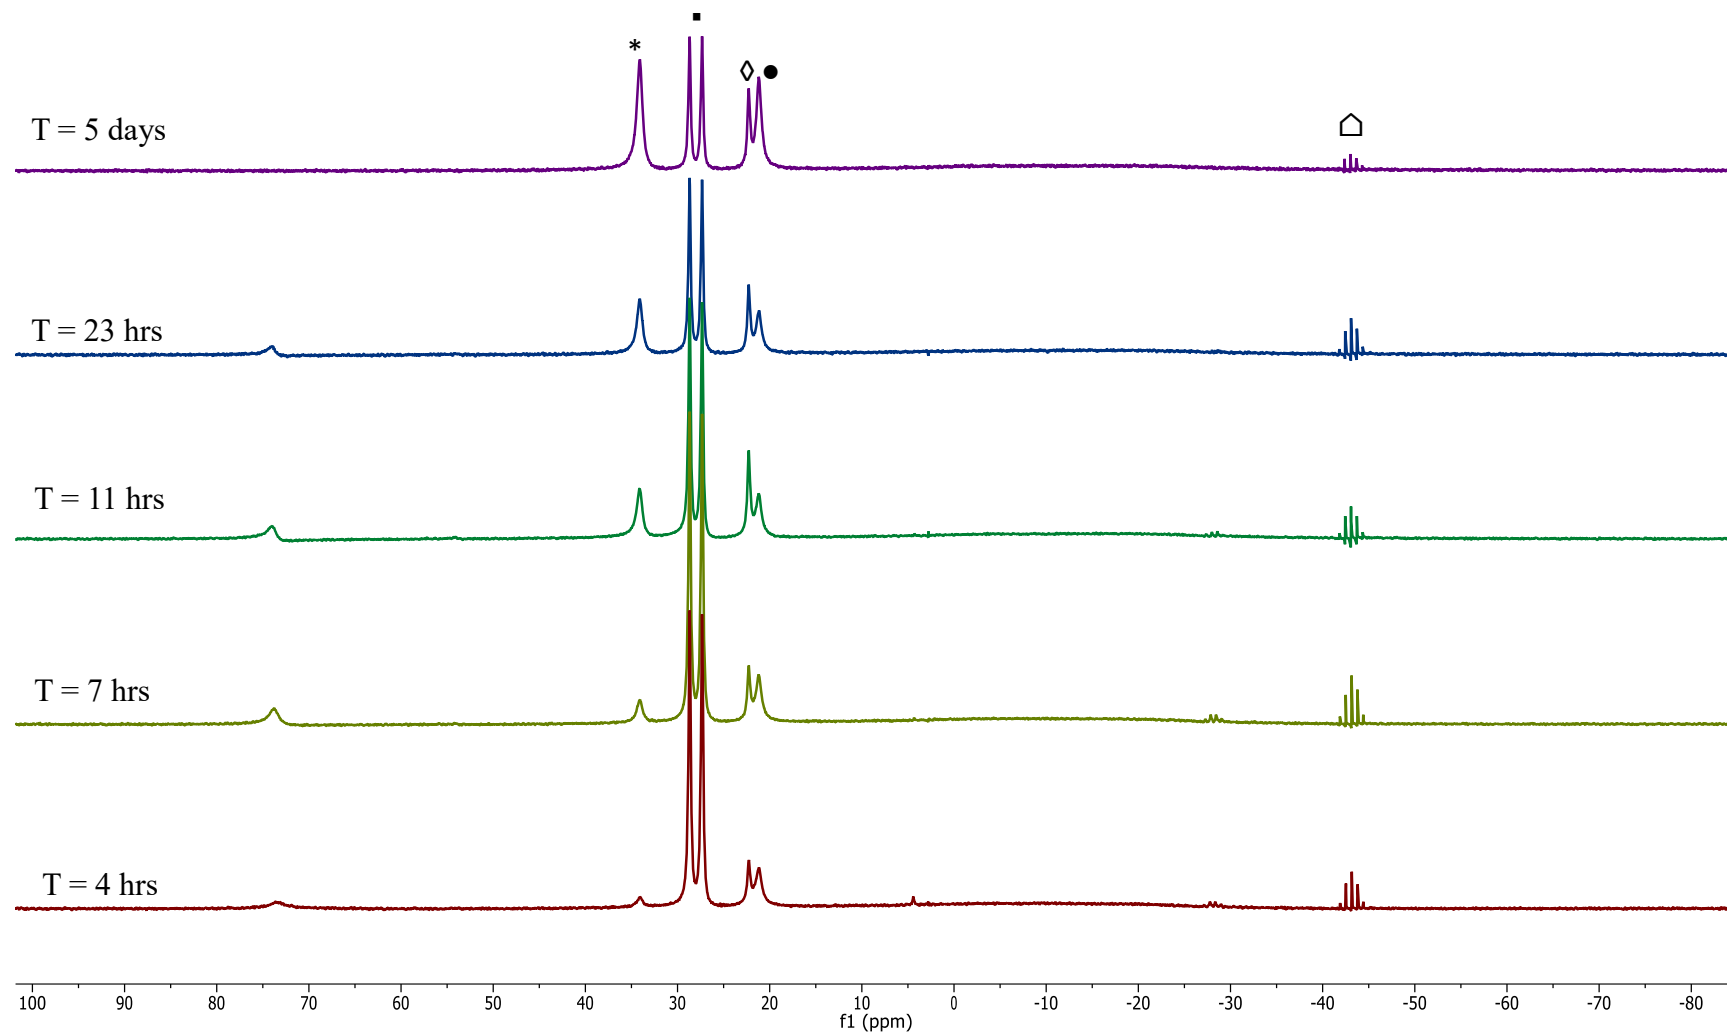

**Figure S 3**  $^{11}\text{B}$  NMR spectra for hydroboration of  $\text{CO}_2$  with 10 mol %  $\text{NaHBET}_3$ , and  $\text{HBpin}$  (1.0 mmol) at various time intervals in  $\text{THF-}d_8$ . (■) represents the  $^{11}\text{B}$  peak for  $\text{HBPin}$  at 27.4 and 28.7 ppm, (◇) represents the peak for  $\text{CH}_3\text{-OBPin}$  at 22.3 ppm, (●) represents the peak for  $\text{pinBOBpin}$  at 21.2 ppm, (△) represents the peak for  $\text{BH}_4^-$  at -43.0 ppm, and (\*) represents the peak for unidentified boron species.

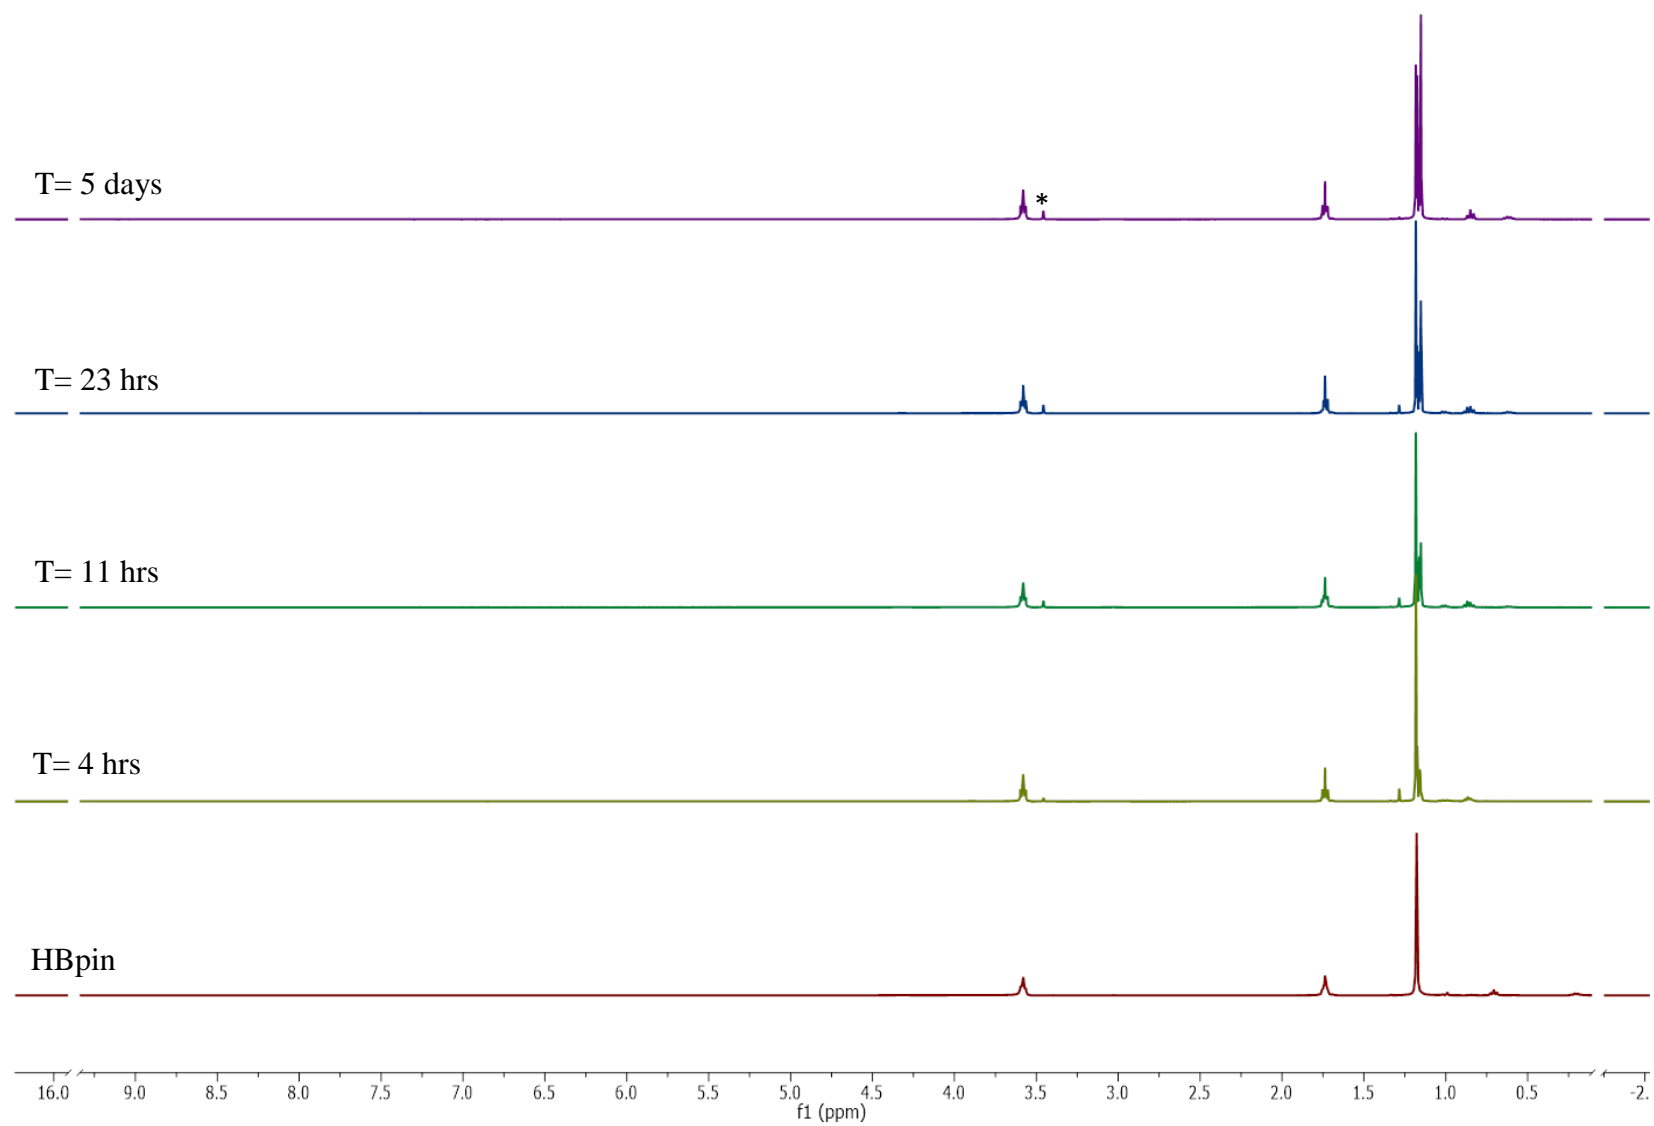

**Figure S 4**  $^1\text{H}$  NMR spectra for hydroboration of  $\text{CO}_2$  with 10 mol %  $\text{NaHBET}_3$ , and HBpin (1.0 mmol) at various time intervals in  $\text{THF-}d_8$ . (\*) represents the peak for  $\text{CH}_3\text{-OBPin}$  at 3.46 ppm.



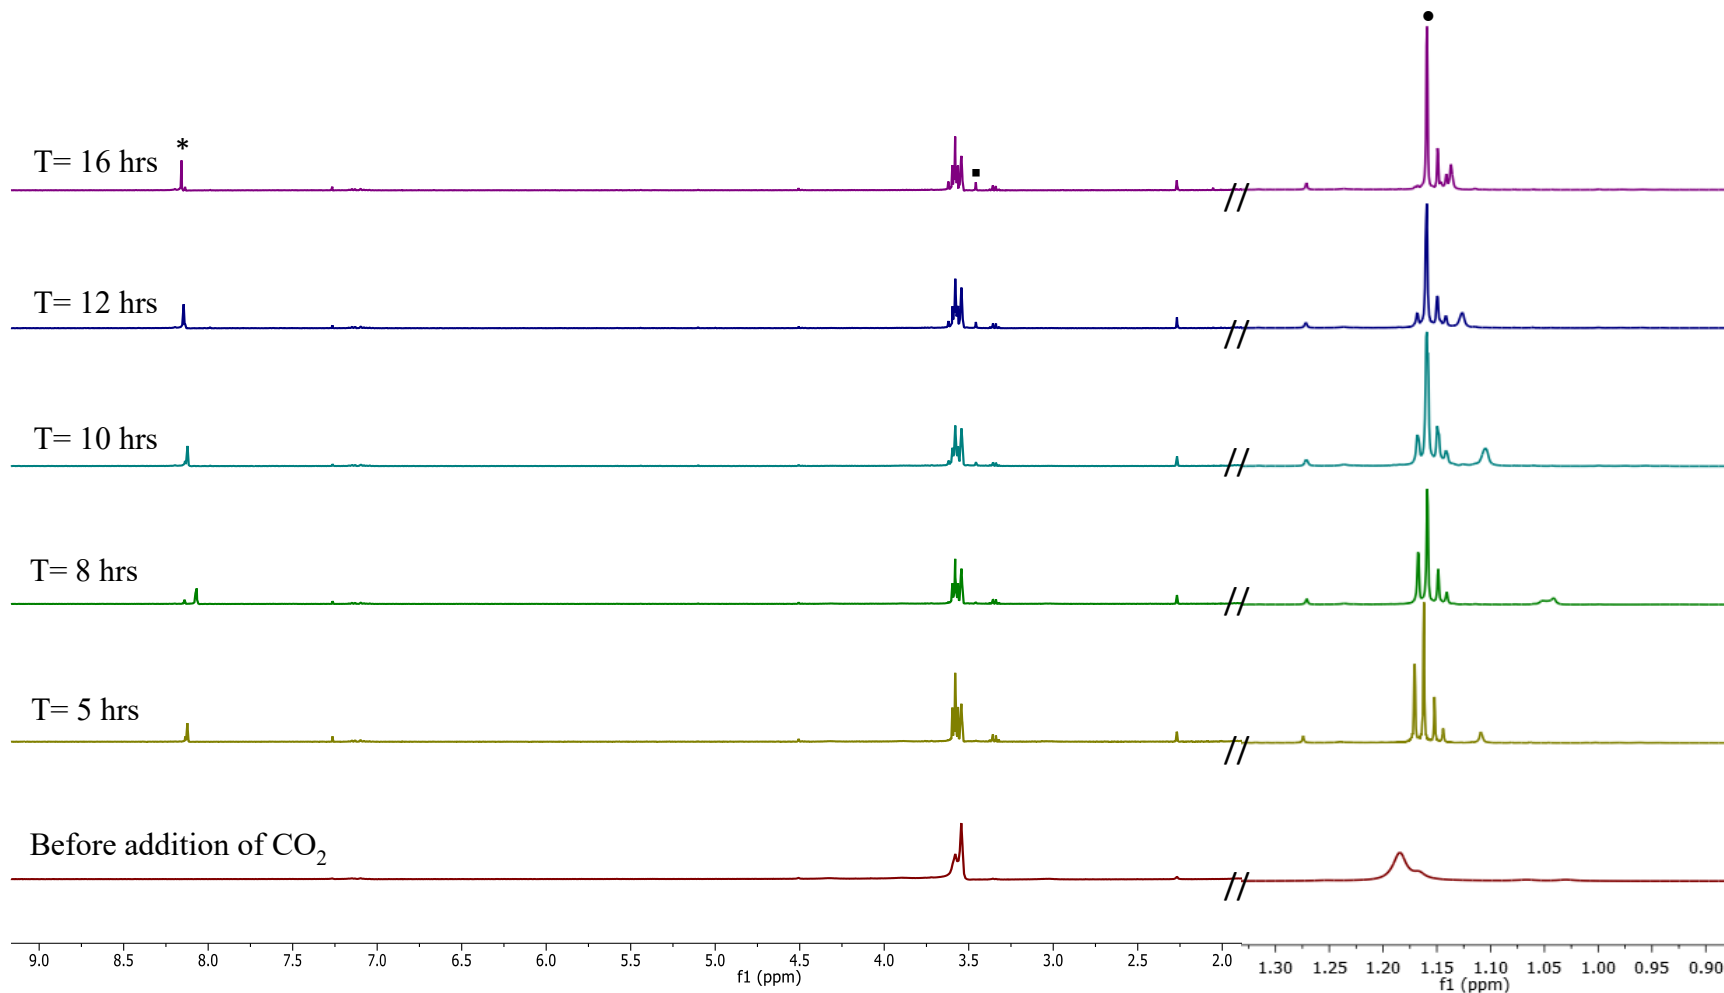

**Figure S 5**  $^1\text{H}$  NMR spectra for hydroboration of  $\text{CO}_2$  with 1 mol %  $\text{Co}(\text{acac})_3$ , 1 mol %  $\text{NaHBET}_3$ , and HBPIn (0.1 mmol) at various time intervals THF- $d_8$ . (▪) represents the  $^1\text{H}$  peak for  $\text{CH}_3\text{-OBPin}$  at 3.46 ppm, (\*) represents the peak for  $\text{HCOOBPin}$  at 8.32 ppm and (•) represents the peak for pinBOBpin at 1.18 ppm.

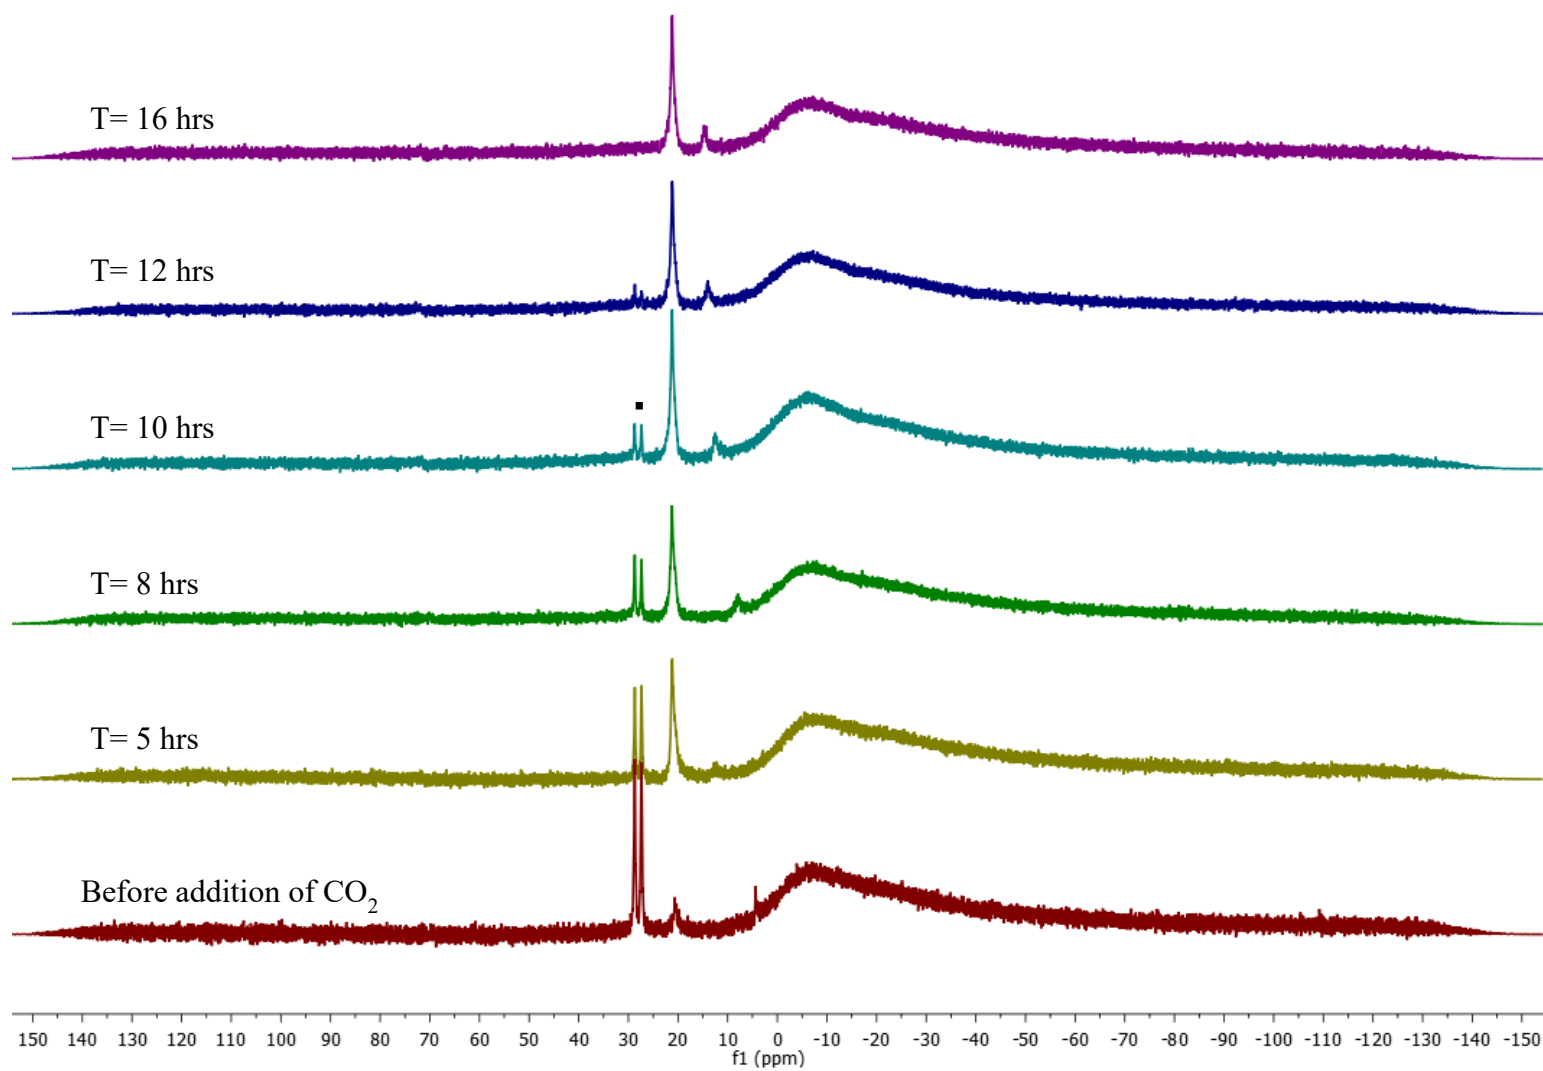

**Figure S 6**  $^{11}\text{B}$  NMR spectra for hydroboration of  $\text{CO}_2$  with 1 mol %  $\text{Co}(\text{acac})_3$ , 1 mol %  $\text{NaHBET}_3$ , and HBPin (0.1 mmol) at various time intervals in  $\text{THF-}d_8$ . The (▪) represents the peak for HBpin.

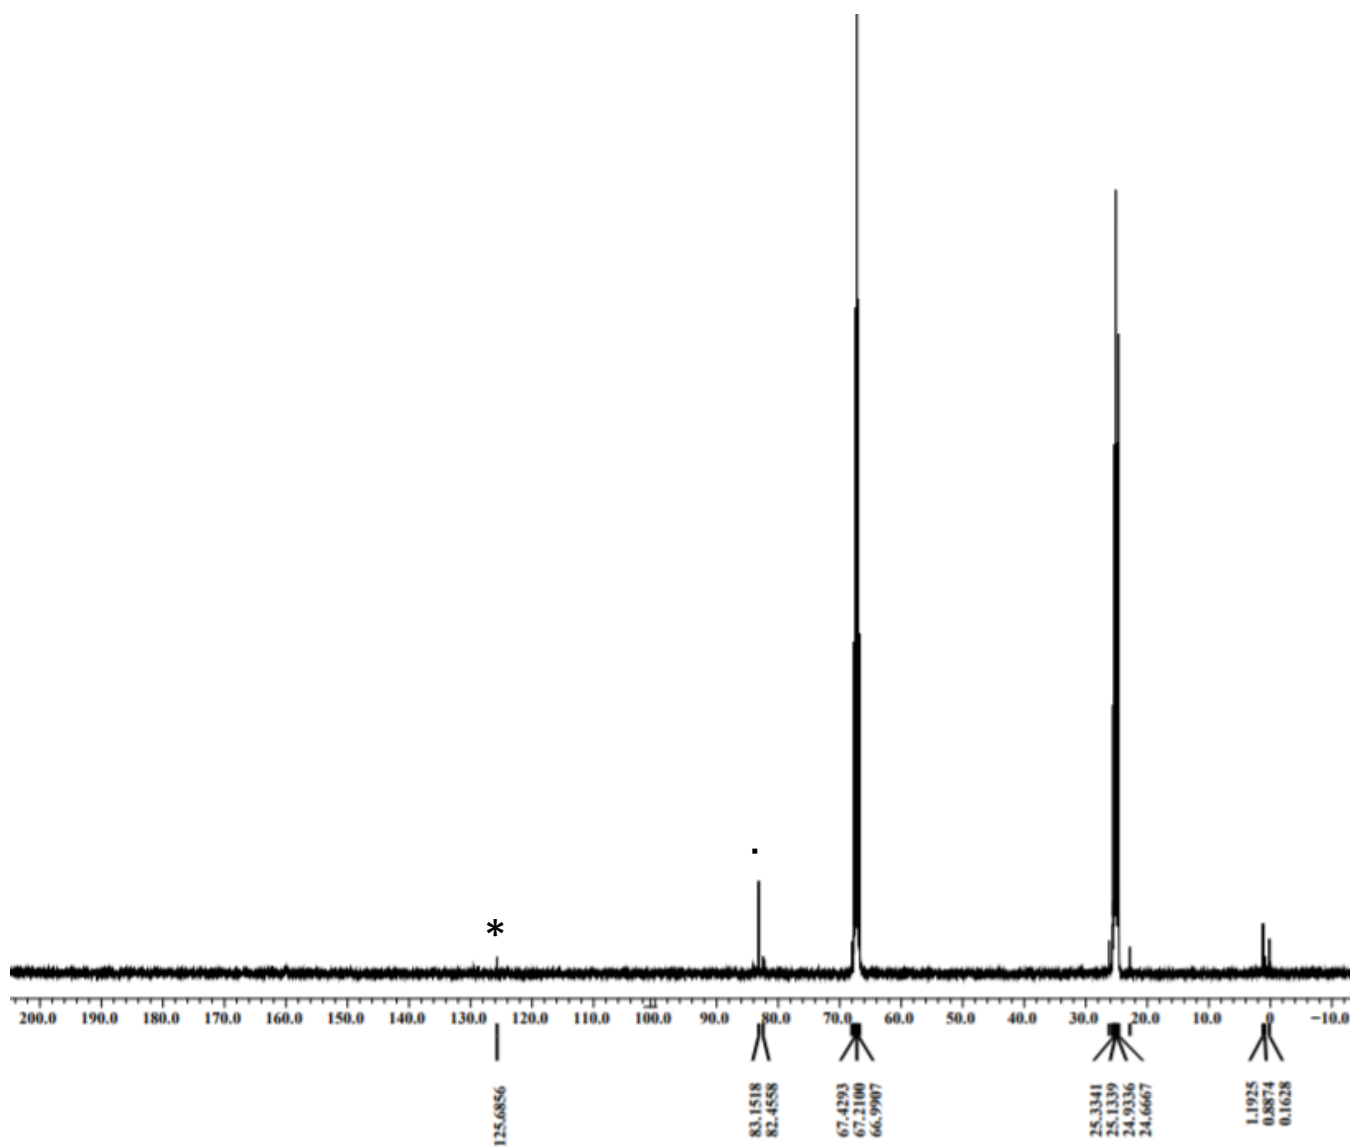

**Figure S 7** <sup>13</sup>C NMR spectra after hydroboration of CO<sub>2</sub> with 1 mol % Co(acac)<sub>3</sub>, 1 mol % NaHBet<sub>3</sub>, and HBpin (0.1 mmol) in THF-*d*<sub>8</sub>. (\*) represents the peak for CO<sub>2</sub> at 125.6 ppm, and (▪) represents the peak for pinBOBpin at 83.15 ppm.

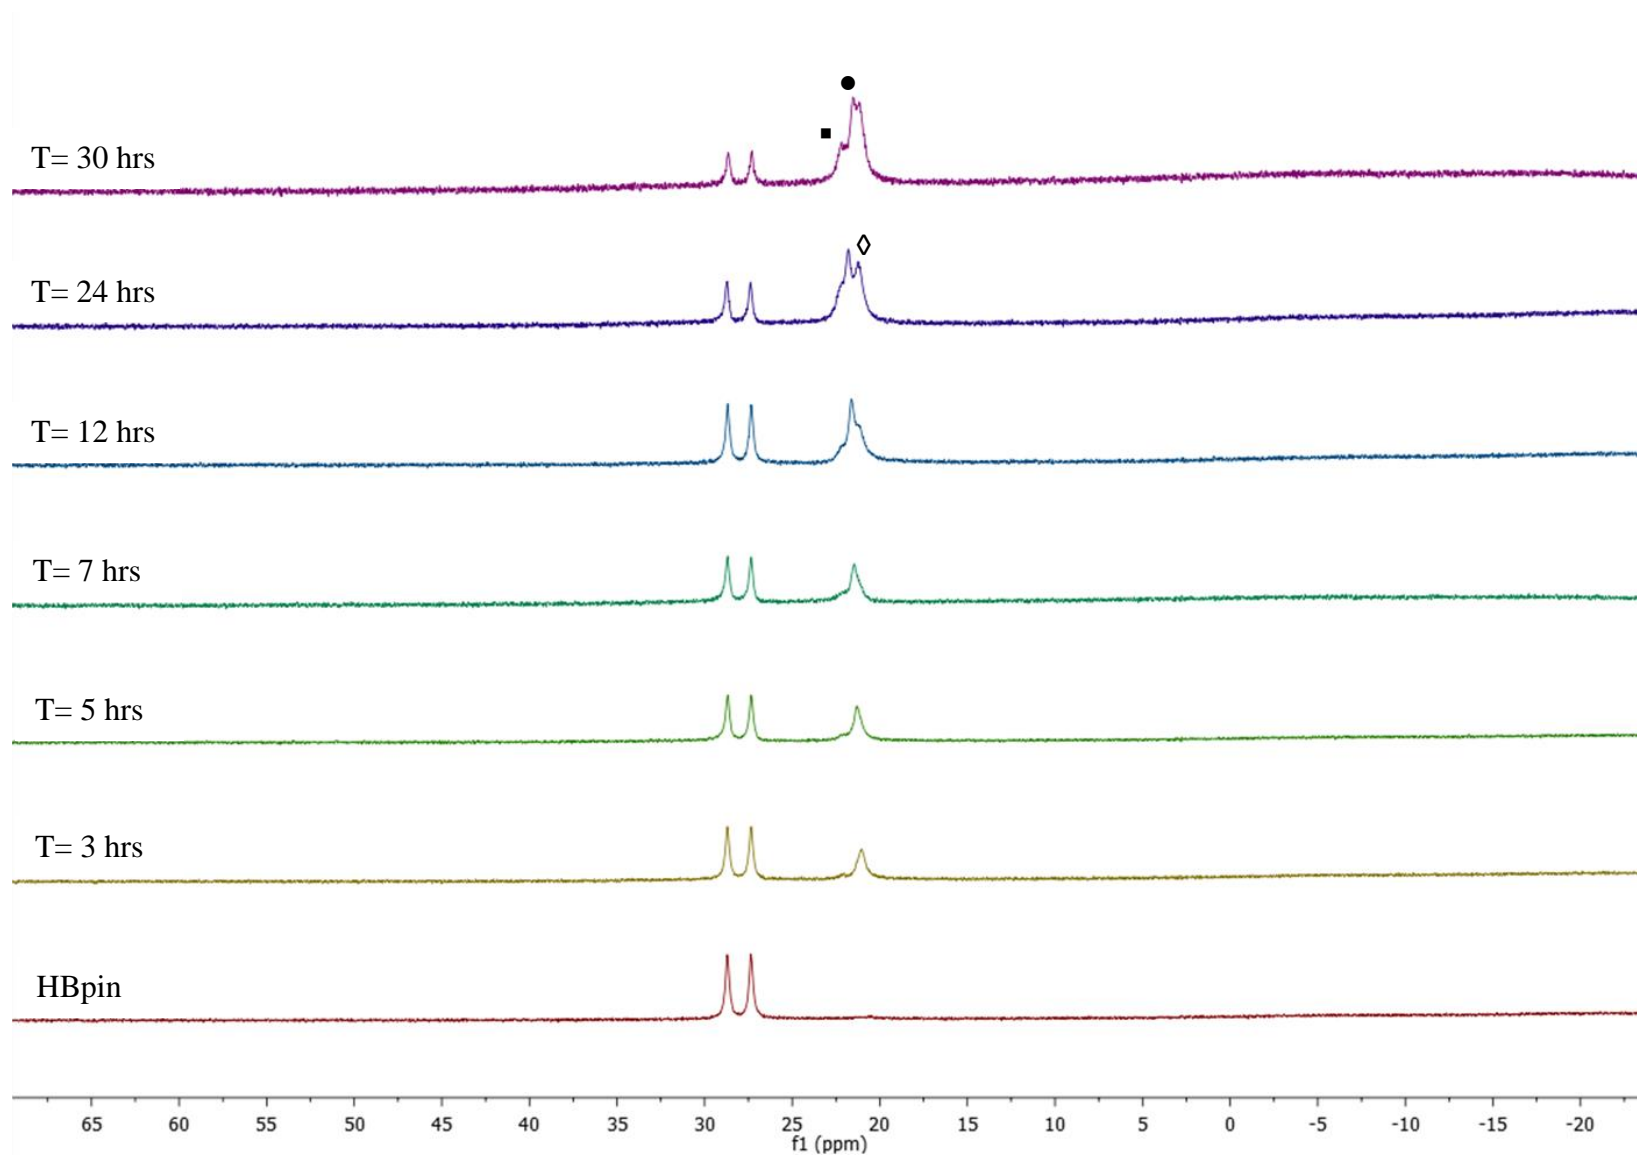

**Figure S 8**  $^{11}\text{B}$  NMR spectra for hydroboration of  $\text{CO}_2$  with 1 mol %  $\text{NaHBET}_3$ , and HBpin (0.1 mmol) at various time intervals THF- $d_8$ . (\*) represents the  $^{11}\text{B}$  peak for HBpin at 27.34 ppm, (■) represents the peak for  $\text{CH}_3\text{-OBPin}$  at 22.23 ppm, (◇) represents the broad peak for  $\text{HCOOBPin}$  at 21.8 ppm, and (●) represents the peak for pinBOBpin at 21.2 ppm.

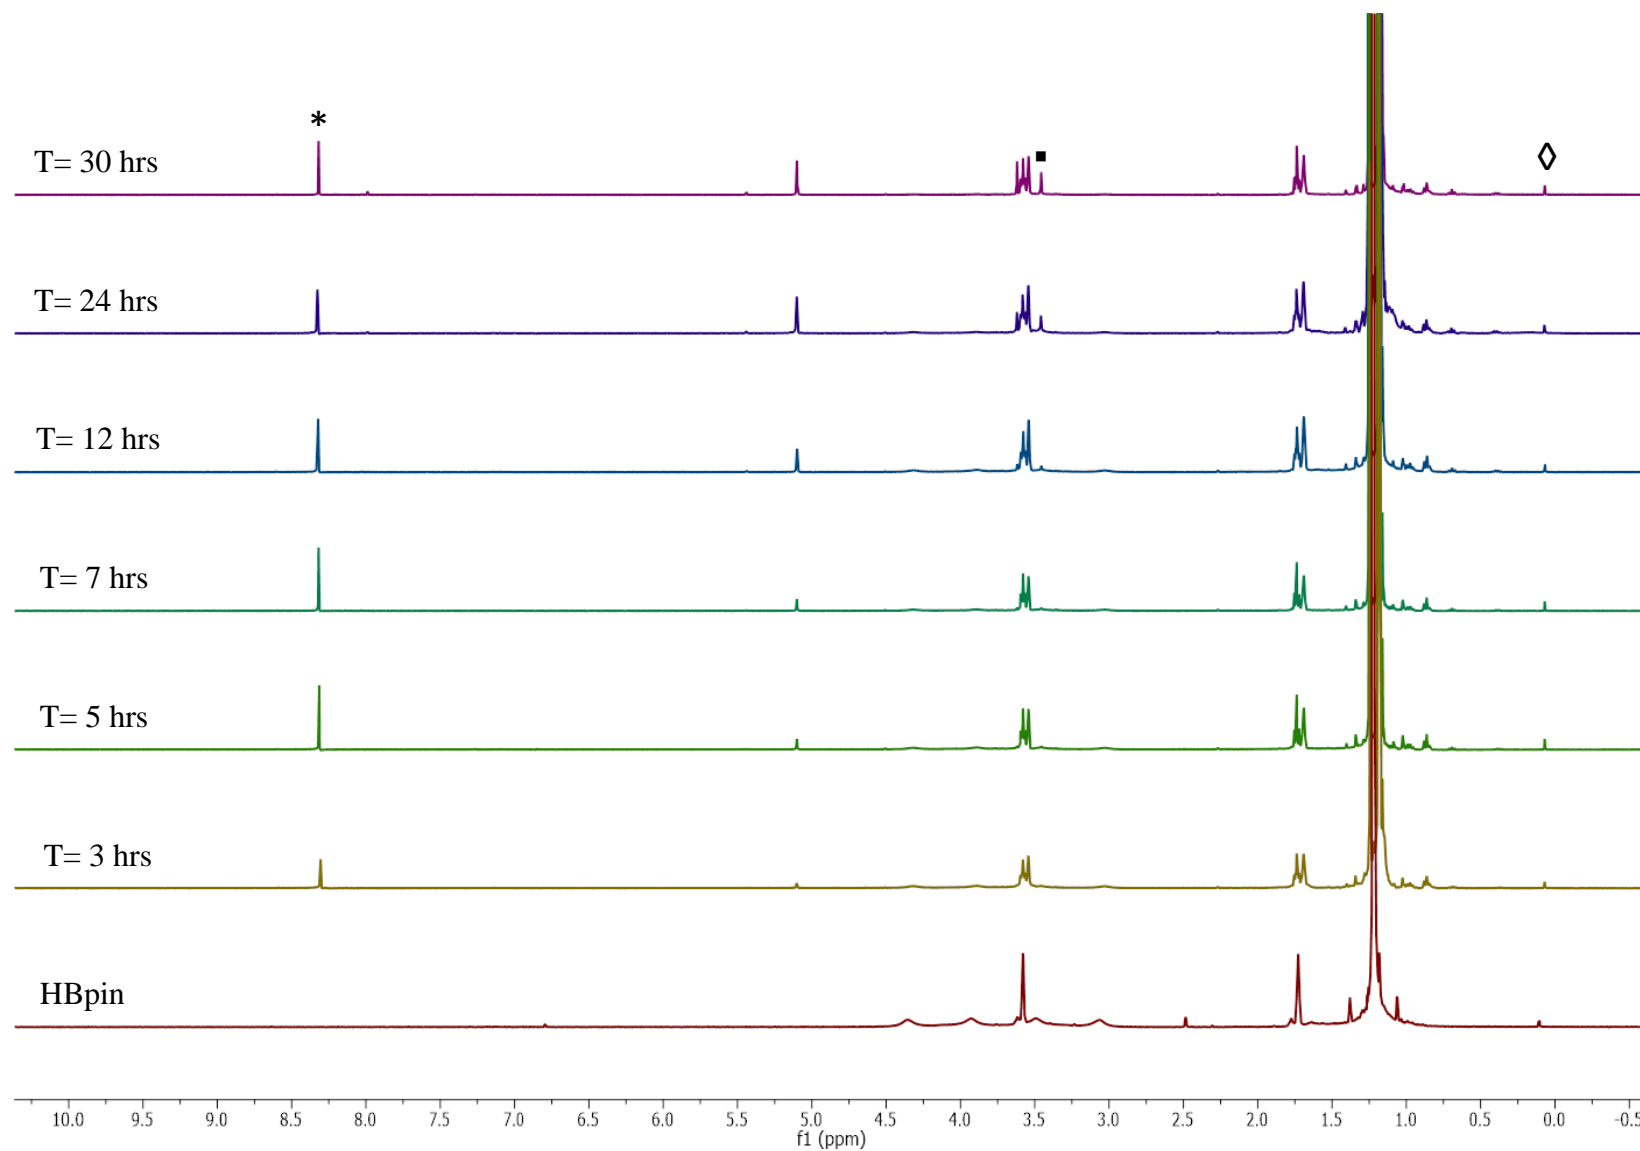

**Figure S 9**  $^1\text{H}$  NMR spectra for hydroboration of  $\text{CO}_2$  with 1 mol %  $\text{NaHBET}_3$ , and HBpin (0.1 mmol) at various time intervals in  $\text{THF-}d_8$ . (▪) represents the  $^1\text{H}$  peak for  $\text{CH}_3\text{-OBPin}$  at 3.46 ppm, (\*) represents the peak for  $\text{HCOOBPin}$  at 8.32 ppm, (◊) represents the peak for grease.

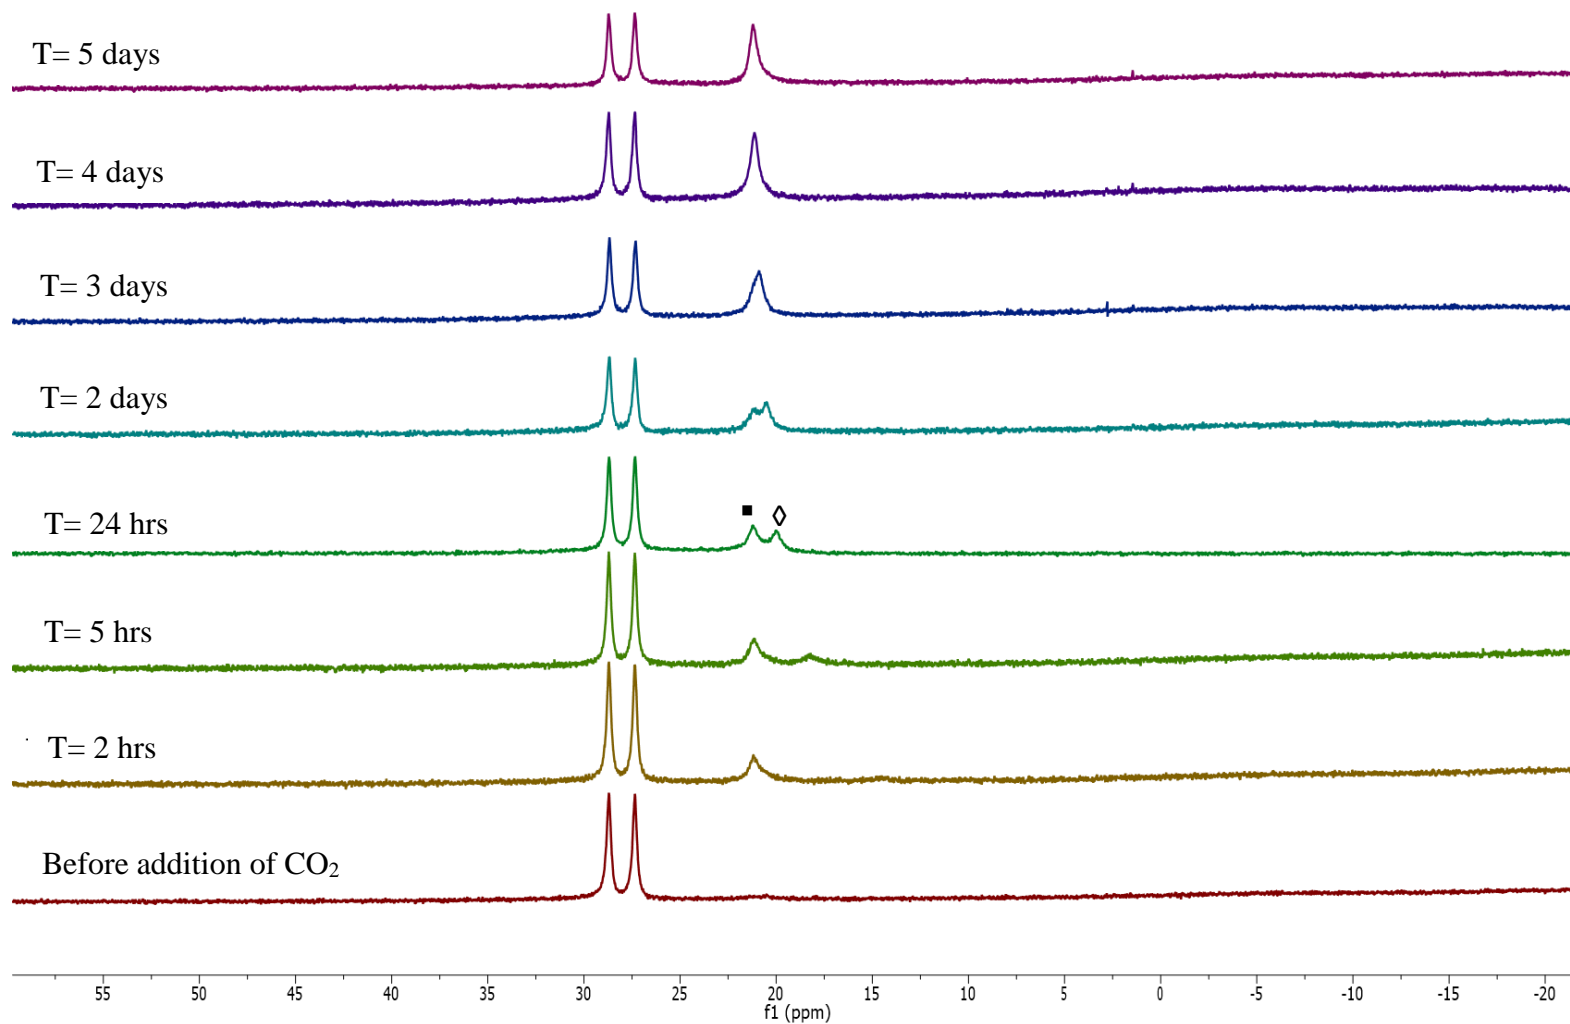

**Figure S 10**  $^{11}\text{B}$  NMR spectra for hydroboration of  $\text{CO}_2$  with and HBpin (0.1 mmol) in the absence of  $\text{Co}(\text{acac})_3$  and  $\text{NaHBEt}_3$  at various time intervals THF- $d_8$ . ( $\blacksquare$ ) represents the  $^{11}\text{B}$  peak for pinBOBpin at 21.2ppm, ( $\diamond$ ) represents the broad peak for HCOOBPin at 20.5 ppm, and (\*) represents the peak for HBpin.

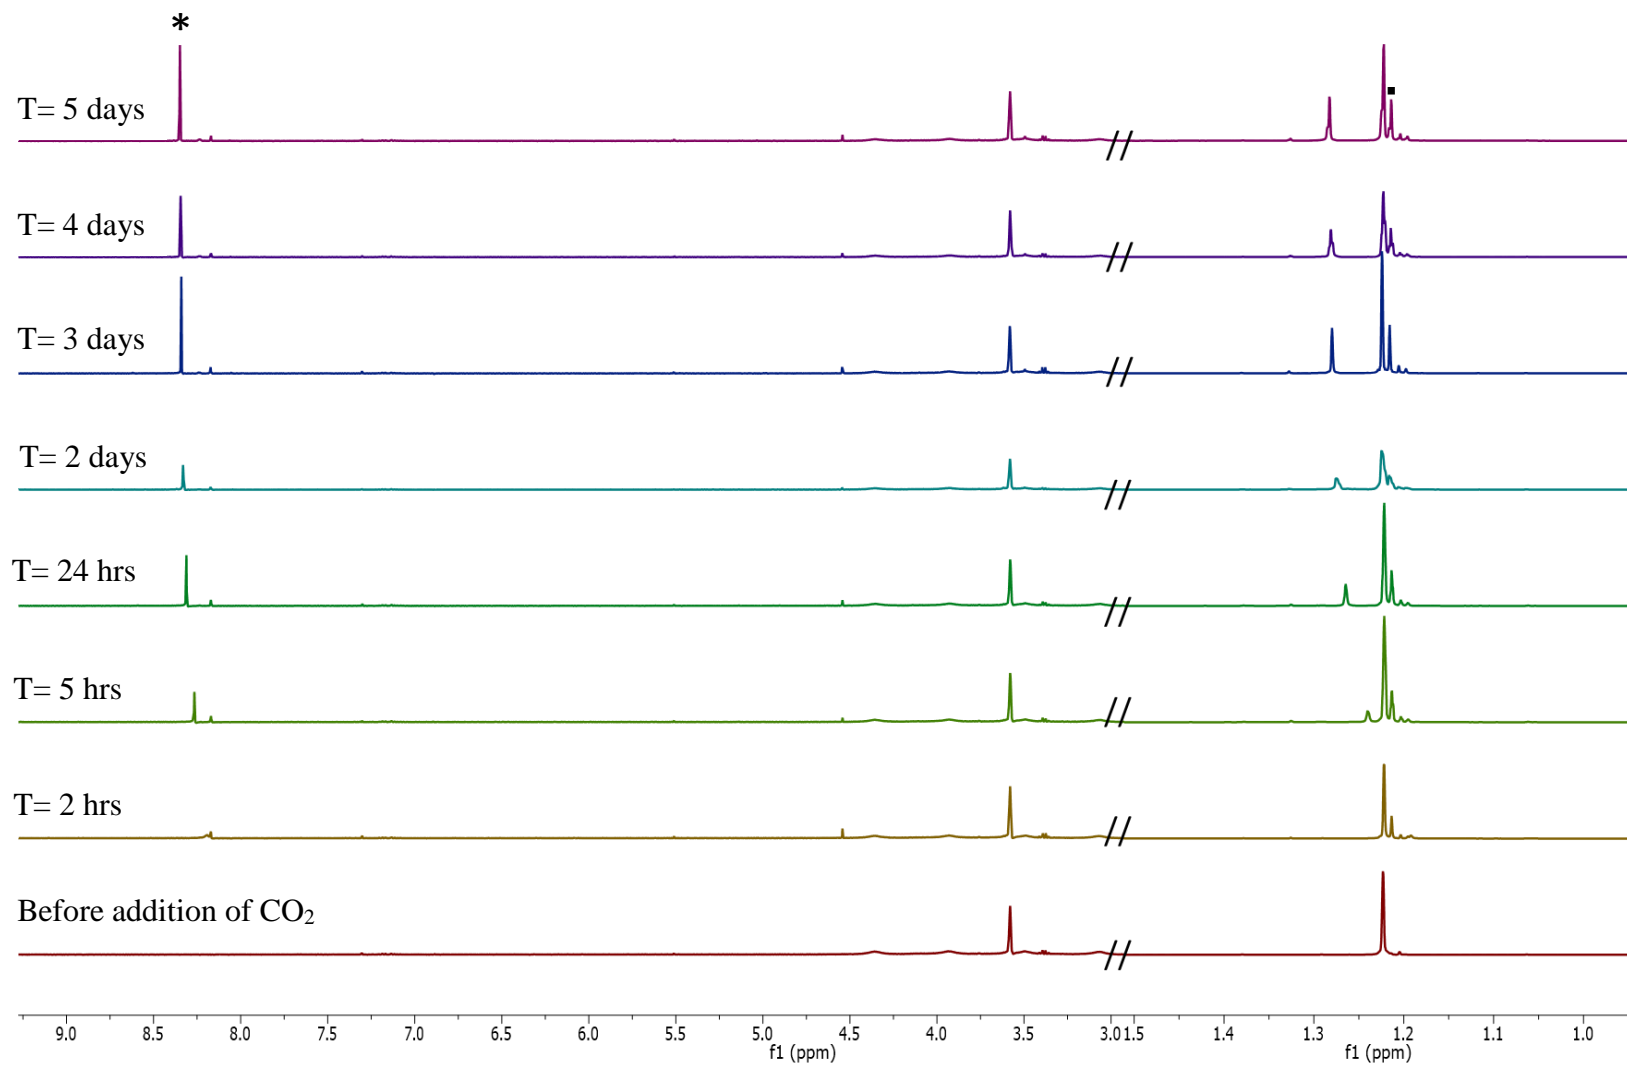

**Figure S 11**  $^1\text{H}$  NMR spectra for hydroboration of  $\text{CO}_2$  with and HBpin (0.1 mmol) in the absence of  $\text{Co}(\text{acac})_3$  and  $\text{NaHBET}_3$  at various time intervals THF- $d_8$ . (■) represents the  $^1\text{H}$  peak for pinBOBpin at 1.21 ppm, and (\*) represents the peak for HCOOBPin at 8.32 ppm.

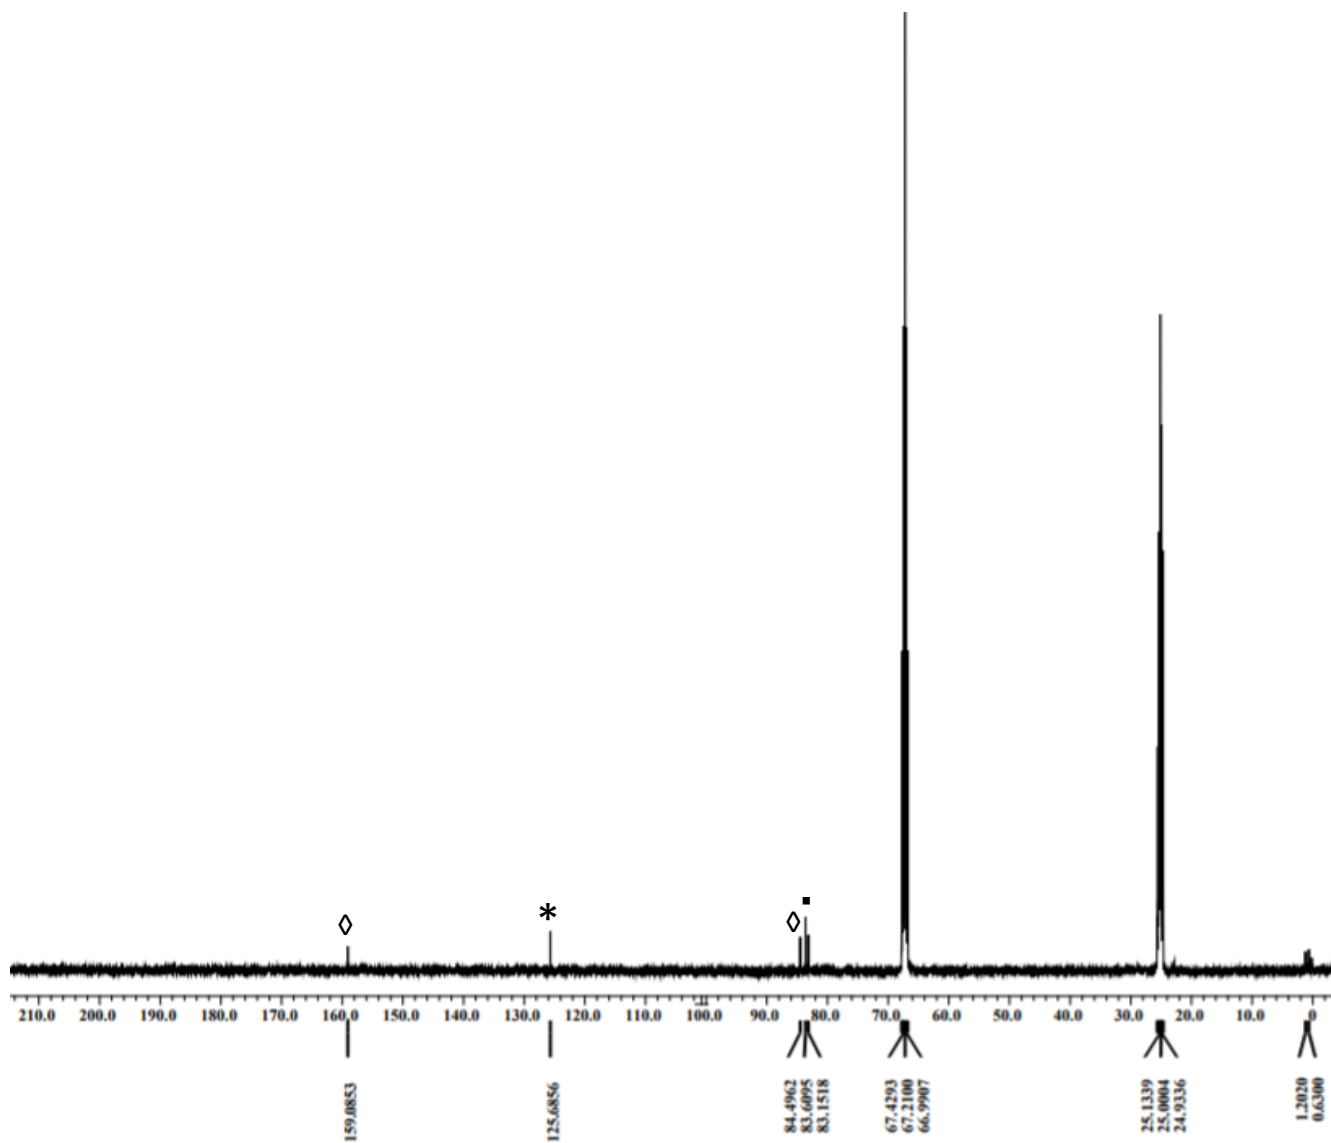

**Figure S 12**  $^{13}\text{C}$  NMR after hydroboration of  $\text{CO}_2$  with HBpin (0.1mmol) in the absence of  $\text{Co}(\text{acac})_3$  and  $\text{NaHBET}_3$  THF- $d_8$ . (◇) represents the peak for HCOOBpin at 159 ppm and 84.49 ppm, (\*) represents the peak for  $\text{CO}_2$ , and (▪) represents the peak for pinBOBpin at 83.15 ppm.



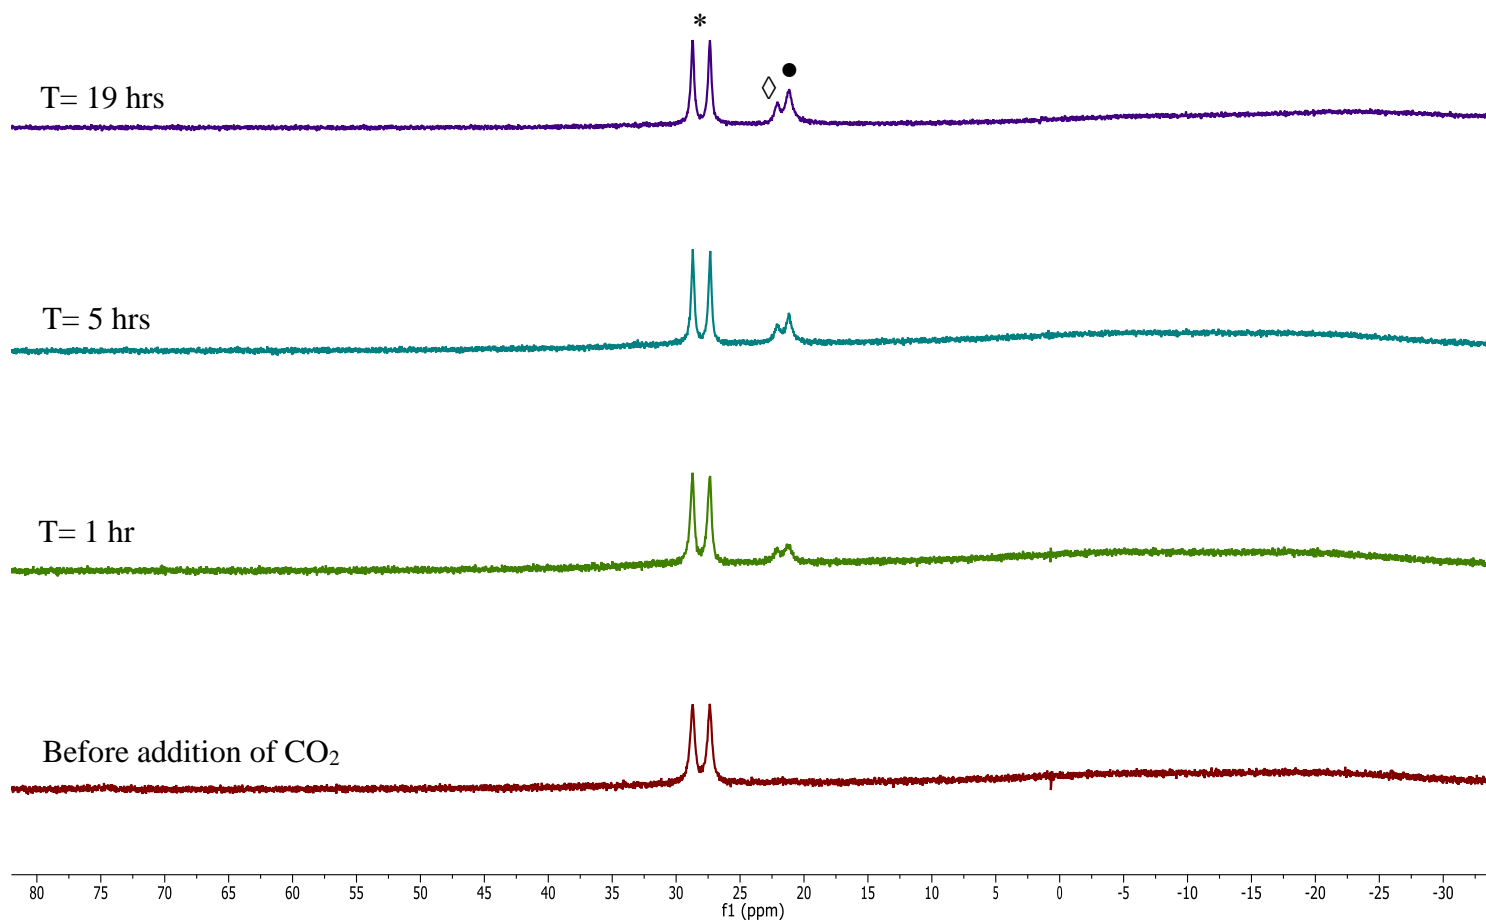

**Figure S 13**  $^{11}\text{B}$  NMR spectra for hydroboration of  $\text{CO}_2$  with 1 mol %  $\text{CoBr}_2$ , 1 mol %  $\text{NaHBEt}_3$ , and HBPin (0.1 mmol) at various time intervals in  $\text{THF-}d_8$ . (●) represents the  $^{11}\text{B}$  peak for pinBOBpin at 21.2 ppm, (◊) represents the broad peak for  $\text{CH}_3\text{OBPin}$  at 22.2 ppm, and (\*) represents the peak for unreacted HBpin.

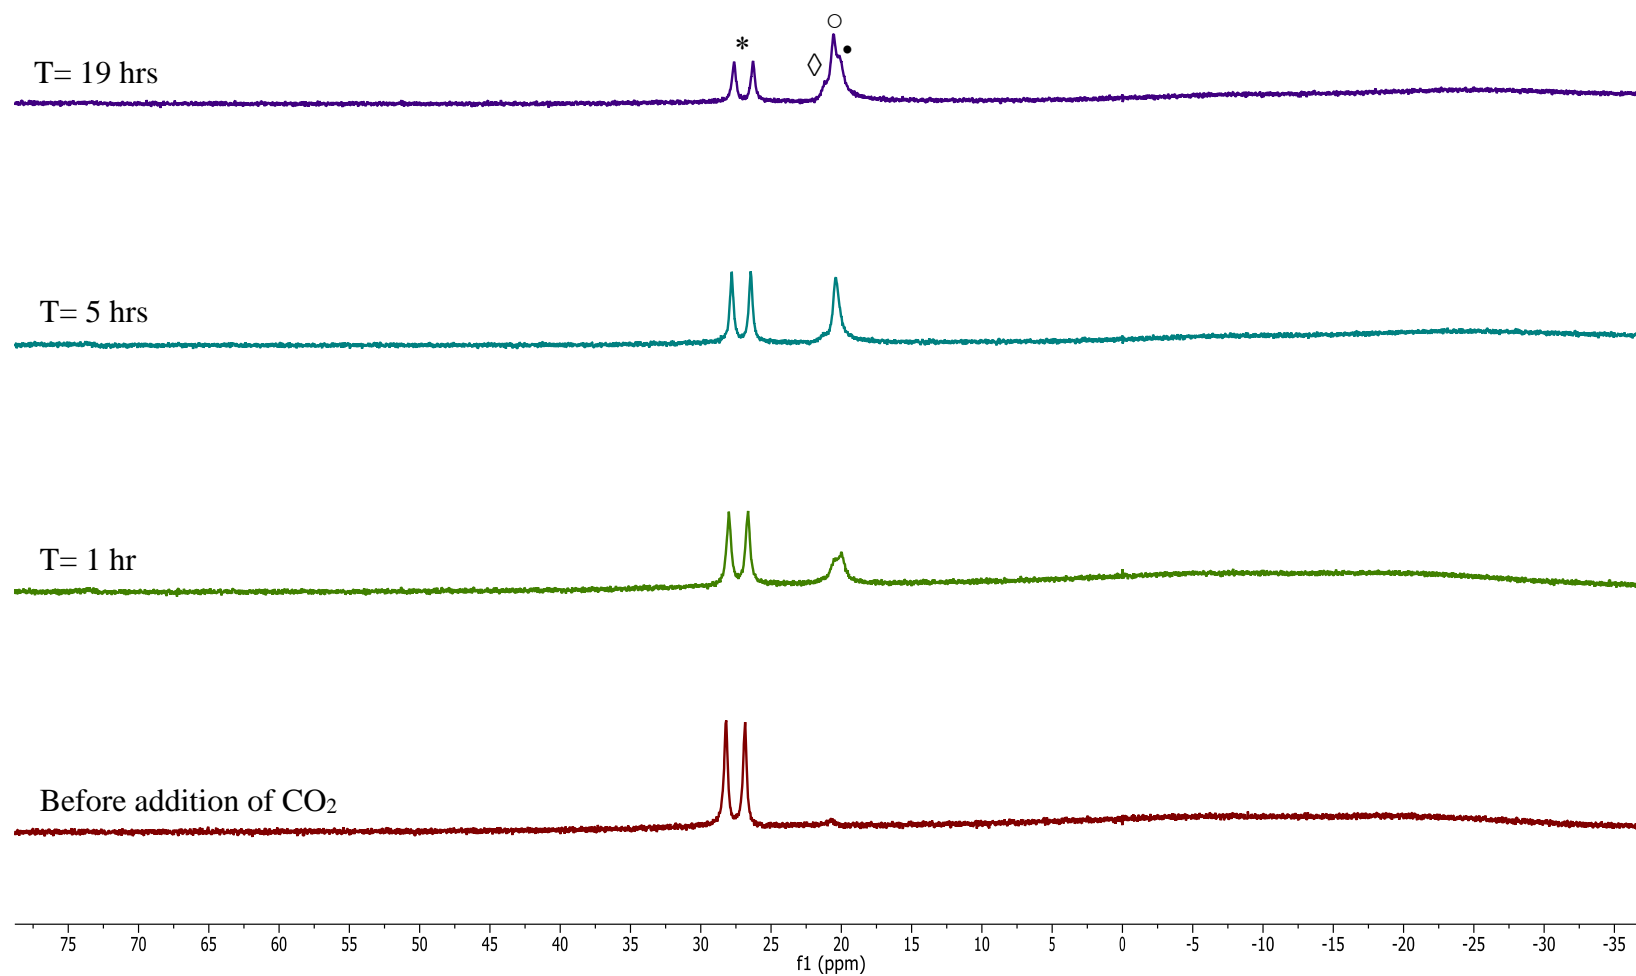

**Figure S 14**  $^{11}\text{B}$  NMR spectra for hydroboration of  $\text{CO}_2$  with 1 mol %  $\text{Co}(\text{acac})_2$ , 1 mol %  $\text{NaHBEt}_3$ , and HBPin (0.1 mmol) at various time intervals in  $\text{THF-}d_8$ . ( $\bullet$ ) represents the  $^{11}\text{B}$  peak for pinBOBpin at 21.2 ppm, ( $\diamond$ ) represents the broad peak for  $\text{CH}_3\text{OBPin}$  at 22.2 ppm, ( $\circ$ ) represents the peak for HCOOBpin at 21.7 ppm and ( $*$ ) represents the peak for unreacted HBpin.

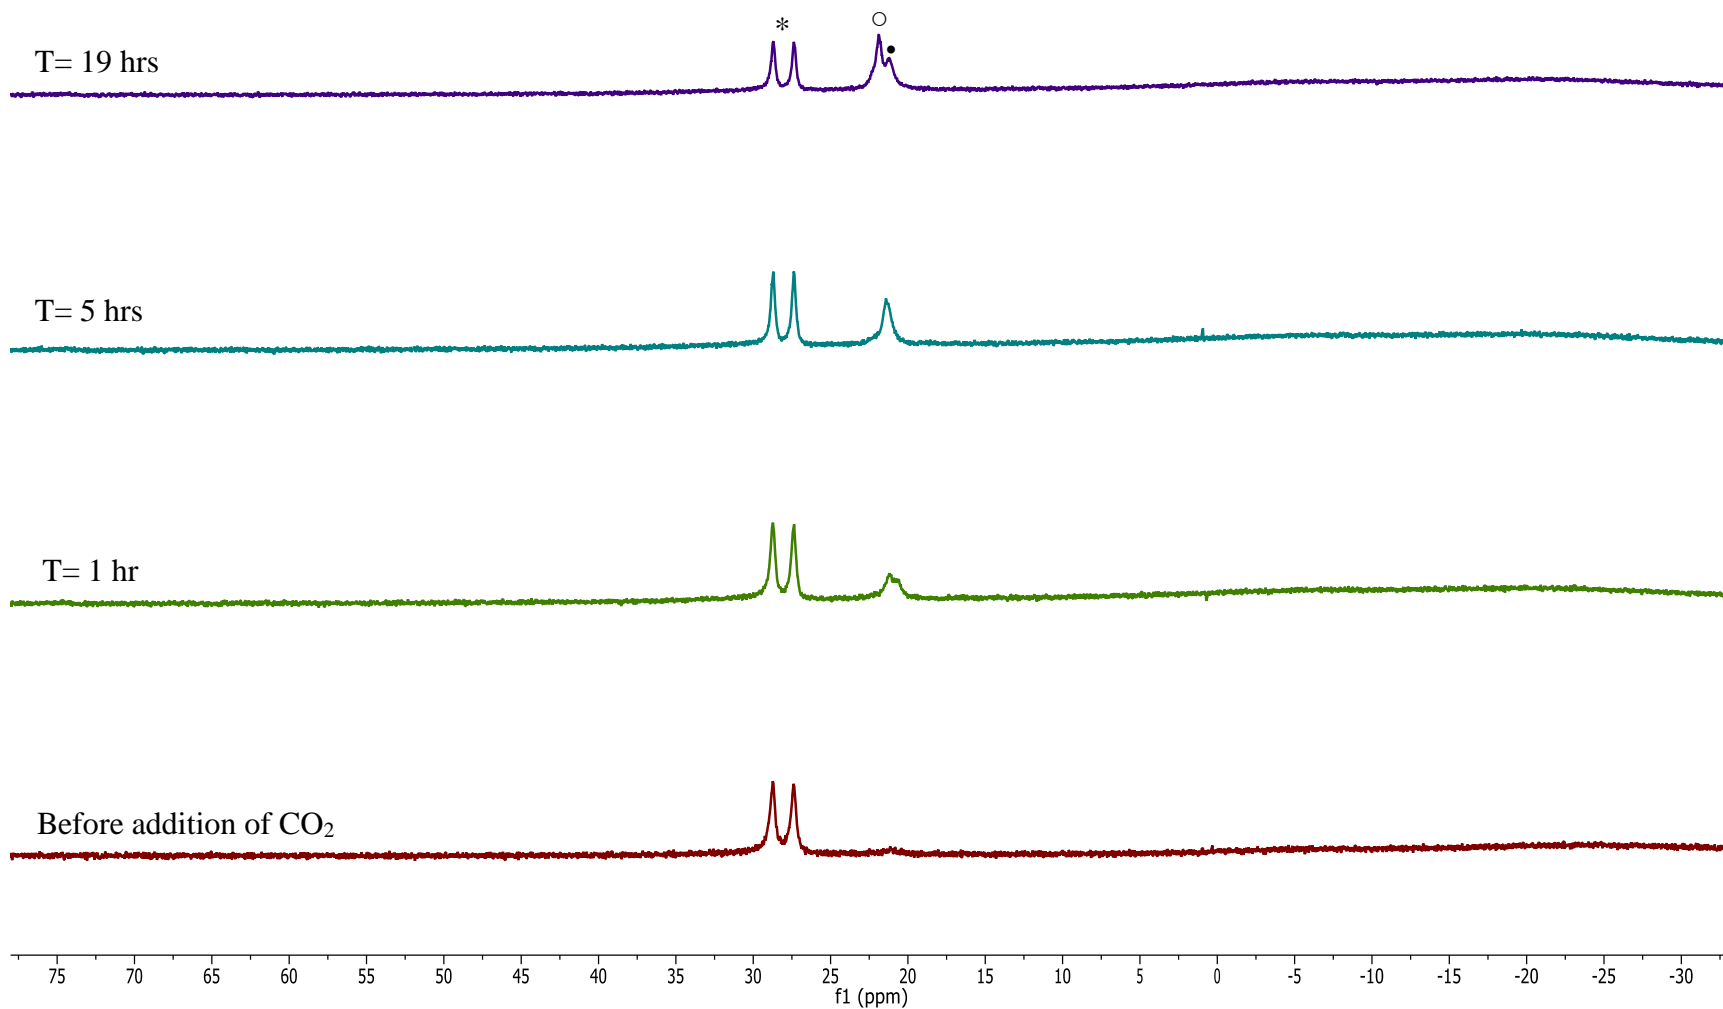

**Figure S 15**  $^{11}\text{B}$  NMR spectra for hydroboration of  $\text{CO}_2$  with 1 mol % Co(II) Benzoate, 1 mol %  $\text{NaHBET}_3$ , and HBPIn (0.1 mmol) at various time intervals in  $\text{THF-}d_8$ . (•) represents the  $^{11}\text{B}$  peak for pinBOBPIn at 21.2 ppm, (o) represents the peak for HCOOBpin at 21.7 ppm and (\*) represents the peak for unreacted HBpin.

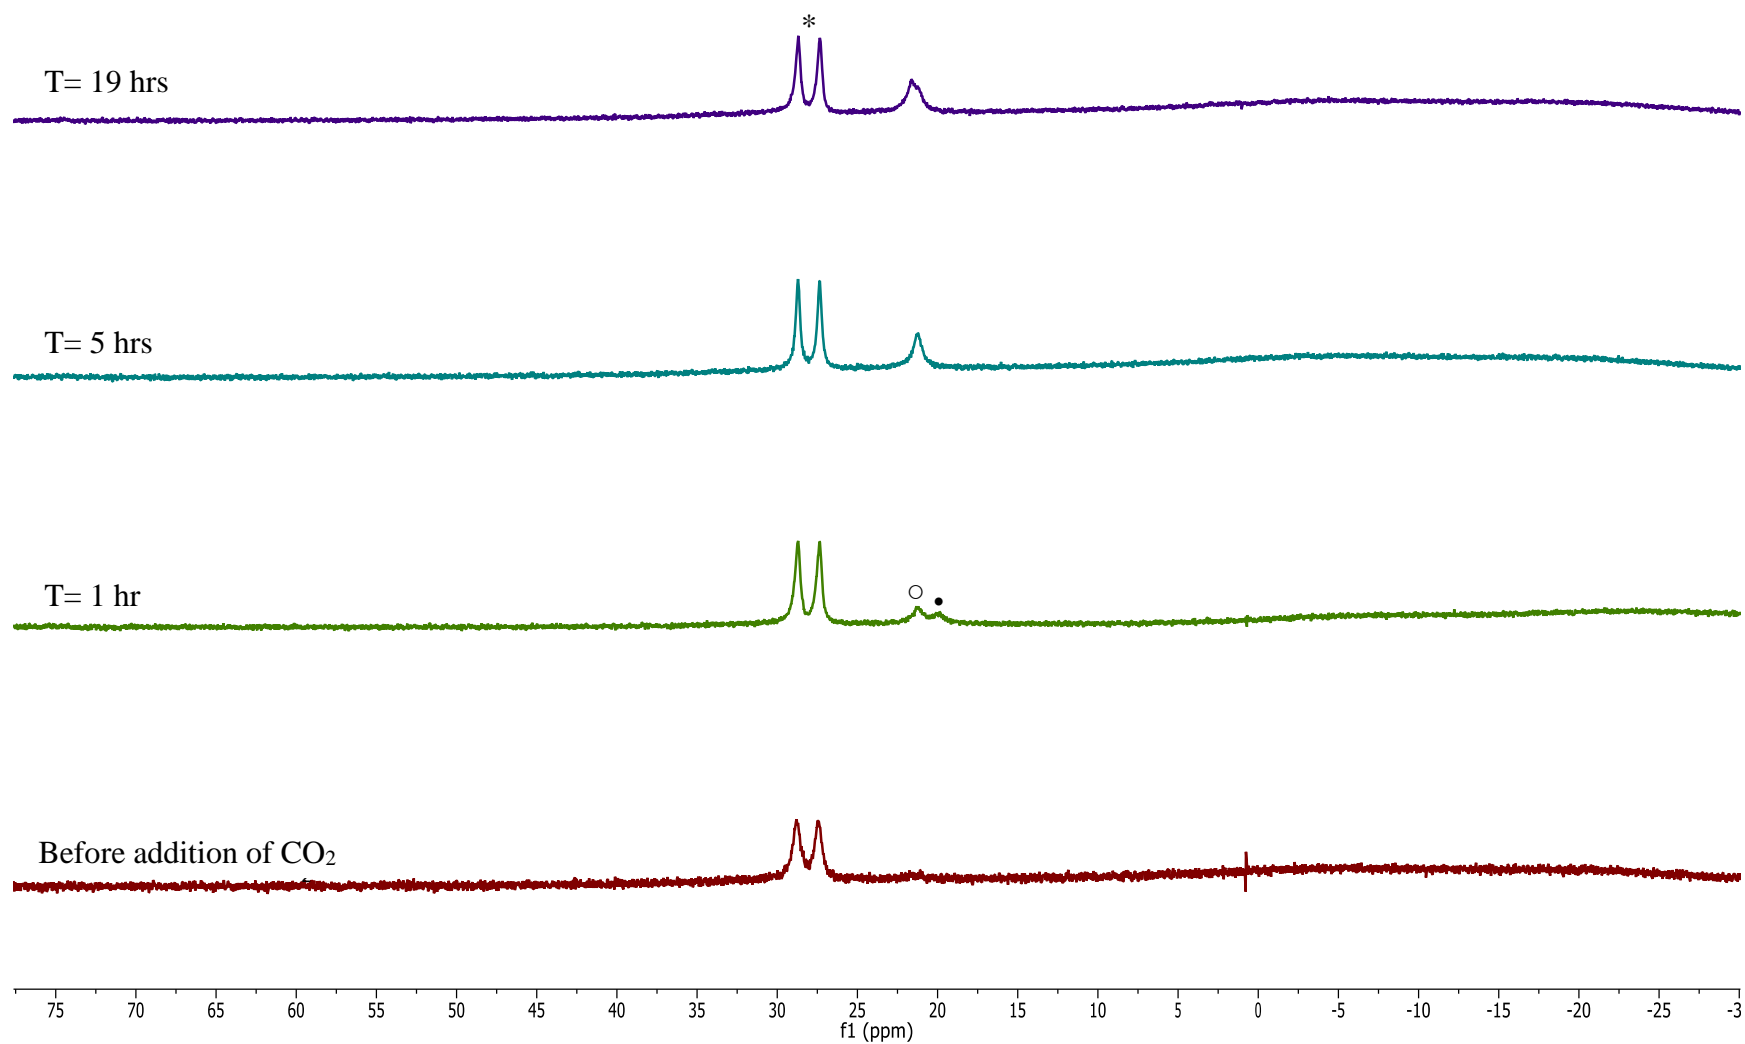

**Figure S 16**  $^{11}\text{B}$  NMR spectra for hydroboration of  $\text{CO}_2$  with 1 mol %  $\text{Co}(\text{TMHD})_3$ , 1 mol %  $\text{NaHBEt}_3$ , and HBPIn (0.1 mmol) at various time intervals in  $\text{THF-}d_8$ . ( $\bullet$ ) represents the  $^{11}\text{B}$  peak for pinBOBpin at 21.2 ppm, ( $\odot$ ) represents the peak for HCOOBpin at 21.7 ppm and (\*) represents the peak for unreacted HBpin.

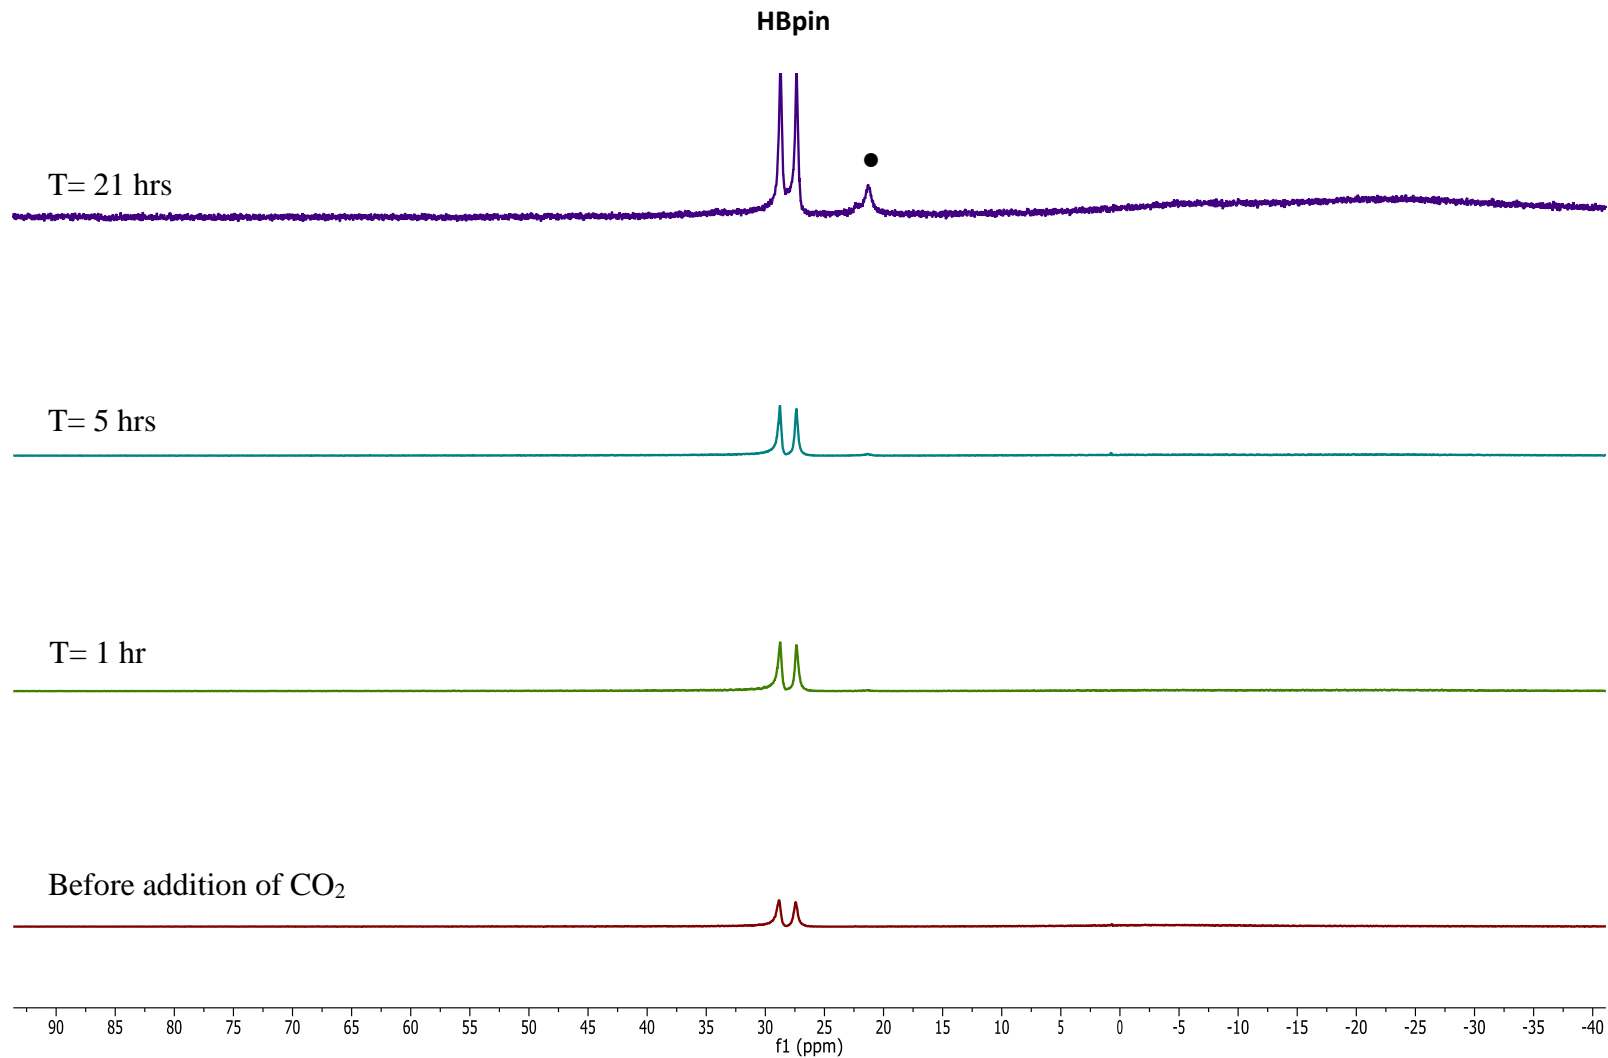

**Figure S 17**  $^{11}\text{B}$  NMR spectra for hydroboration of  $\text{CO}_2$  with 1 mol %  $\text{Co}(\text{acac})_3$ , 1 mol %  $\text{NaHBET}_3$ , and HBPIn (0.1 mmol) at various time intervals in Toluene- $d_8$ . (●) represents the broad overlapped peak for pinBOBpin and HCOOBpin at 21.2 ppm.

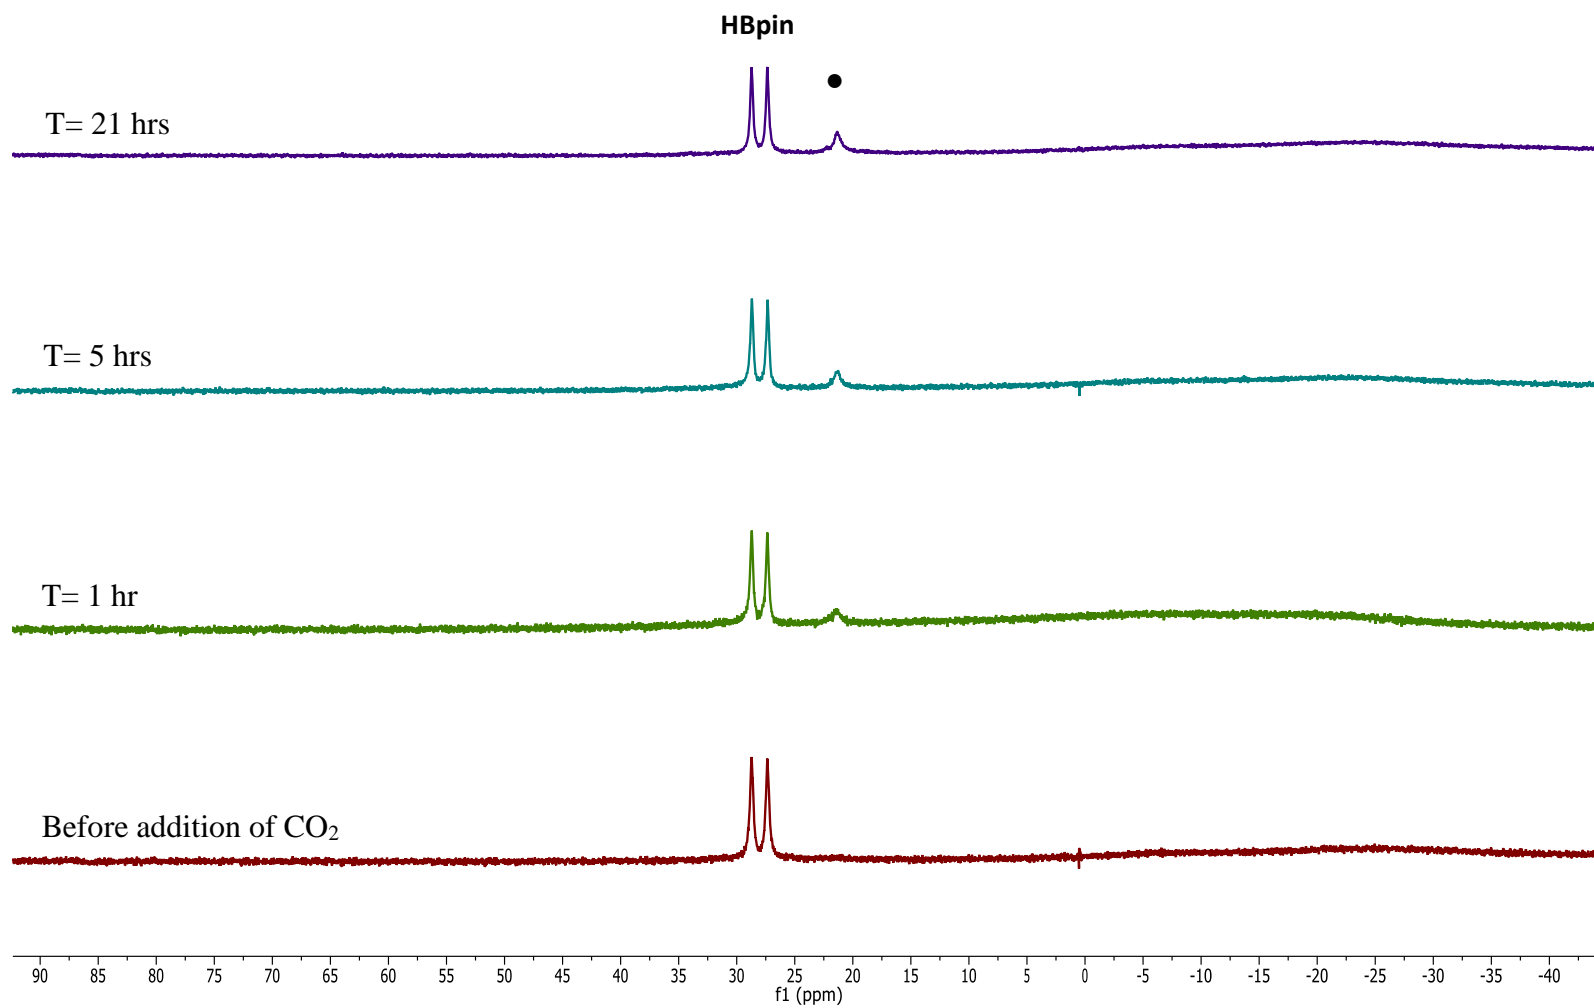

**Figure S 18**  $^{11}\text{B}$  NMR spectra for hydroboration of  $\text{CO}_2$  with 1 mol %  $\text{Co}(\text{acac})_3$ , 1 mol %  $\text{NaHBEt}_3$ , and HBPin (0.1 mmol) at various time intervals in benzene- $d_6$ . (●) represents the broad peak for pinBOBpin at 21.4 ppm.

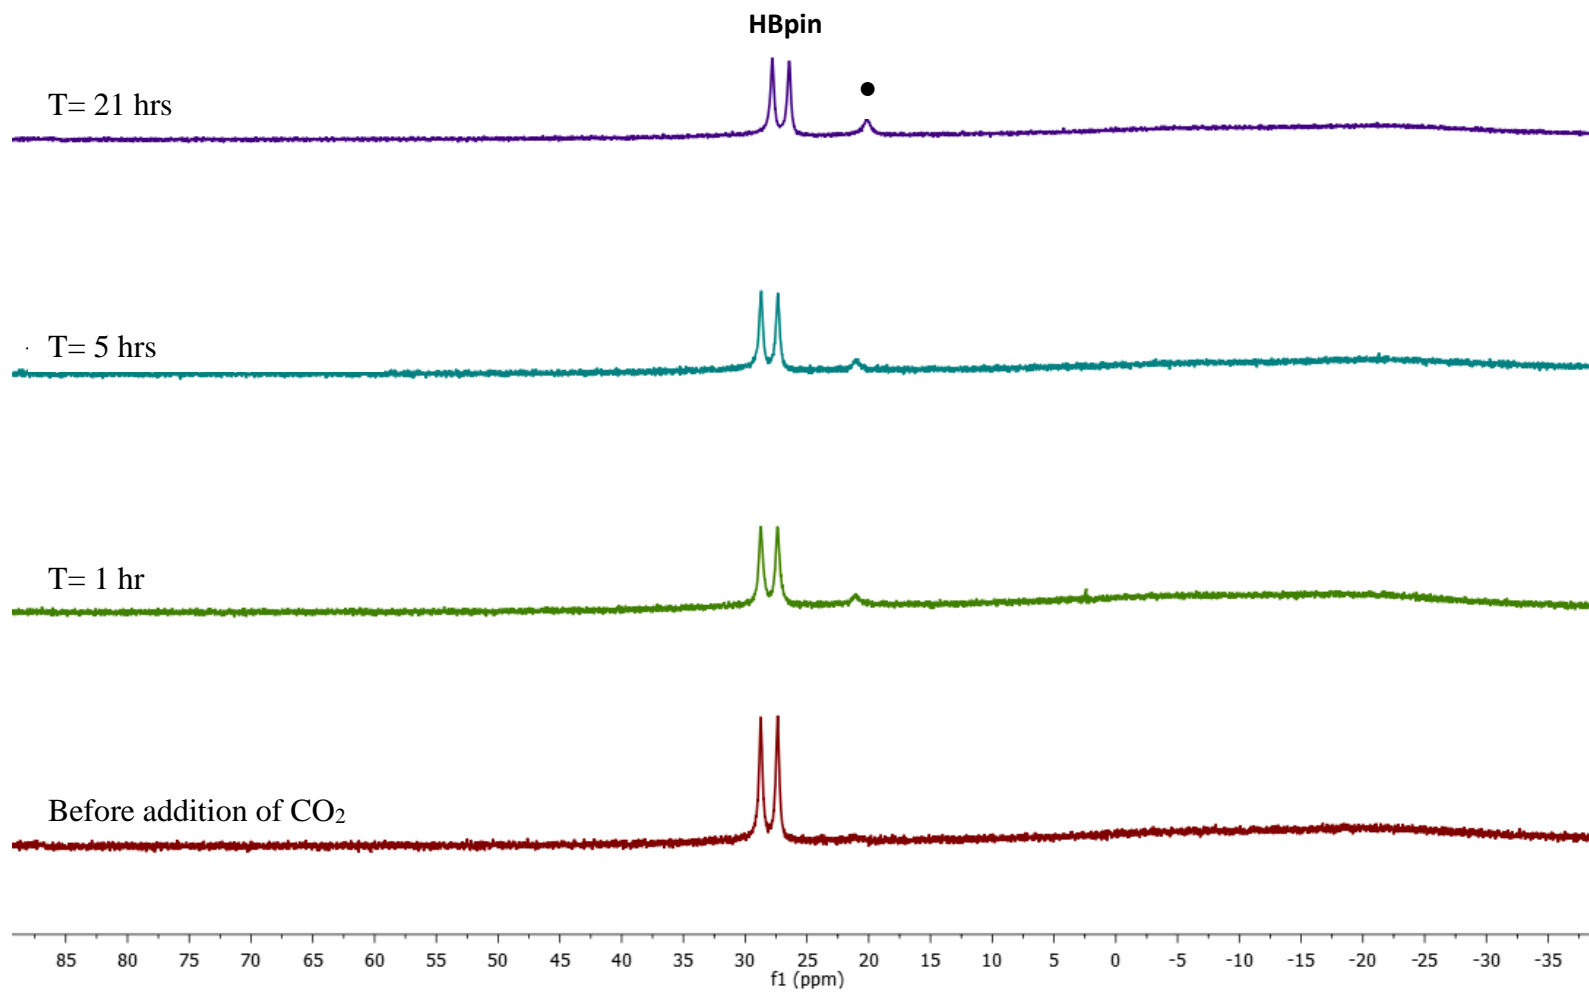

**Figure S 19**  $^{11}\text{B}$  NMR spectra for hydroboration of  $\text{CO}_2$  with 1 mol %  $\text{Co}(\text{acac})_3$ , 1 mol %  $\text{NaHBET}_3$ , and HBPIn (0.1 mmol) at various time intervals in  $\text{CD}_2\text{Cl}_2-d_2$ . (●) represents the peaks for pinBOBpin at 21.1 ppm.

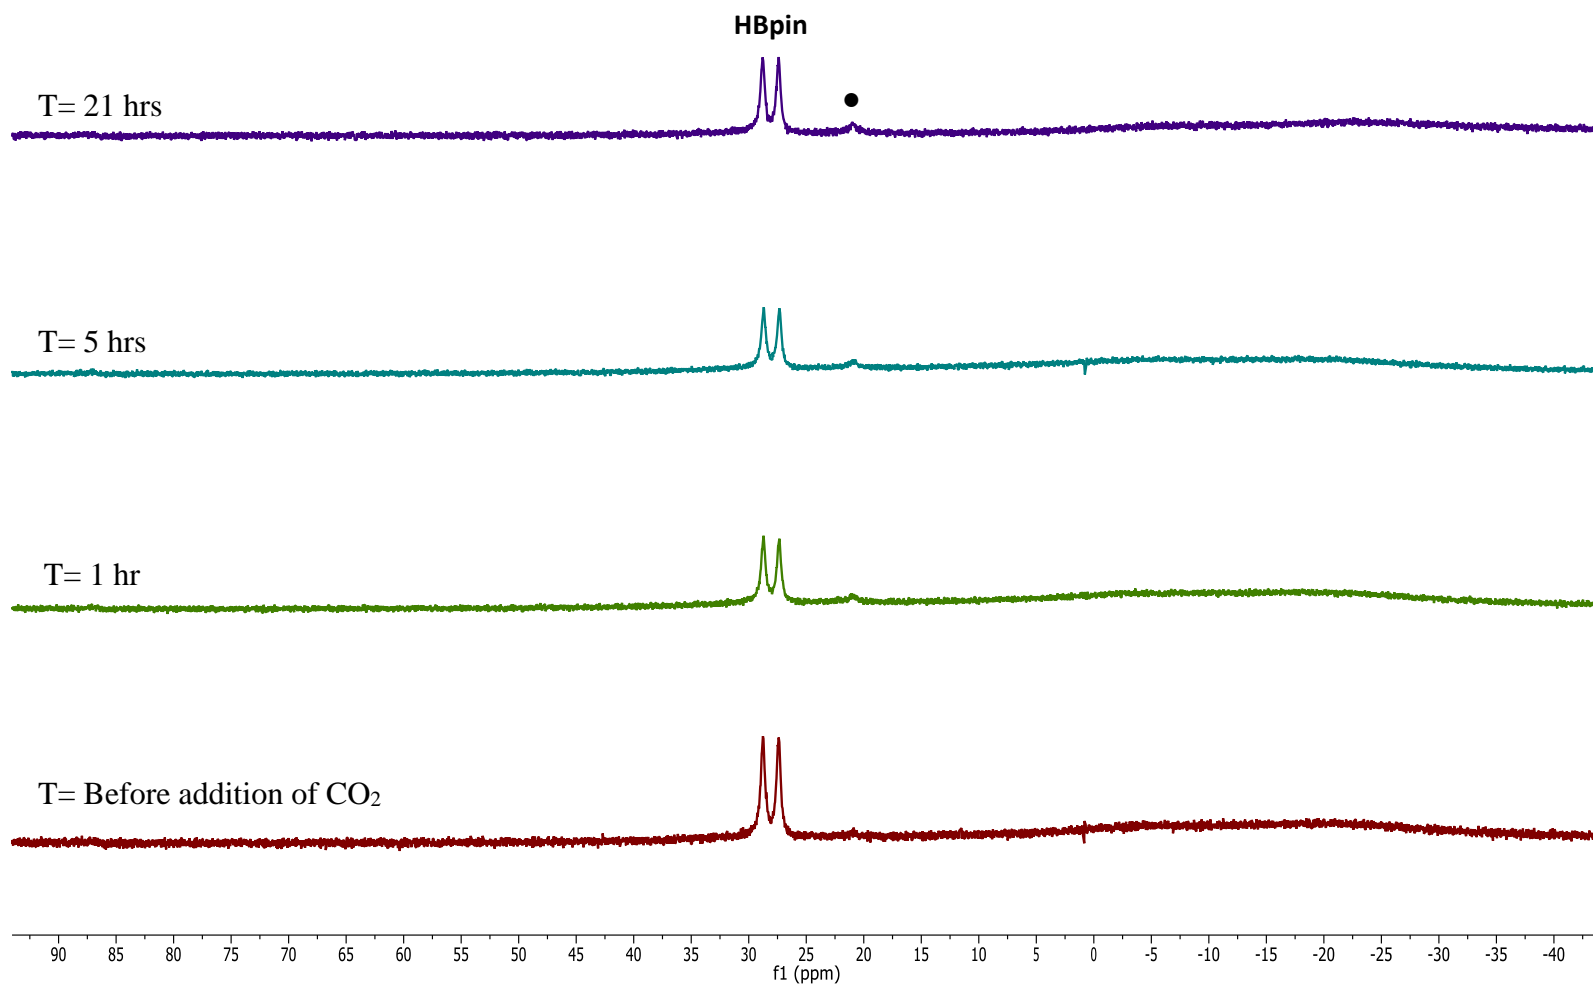

**Figure S 20**  $^{11}\text{B}$  NMR spectra for hydroboration of  $\text{CO}_2$  with 1 mol %  $\text{Co}(\text{acac})_3$ , 1 mol %  $\text{NaHBET}_3$ , and HBPIn (0.1 mmol) at various time intervals in  $\text{CDCl}_3$ . (●) represents the peaks for trace amount of pinBOBpin at 21.0 ppm.



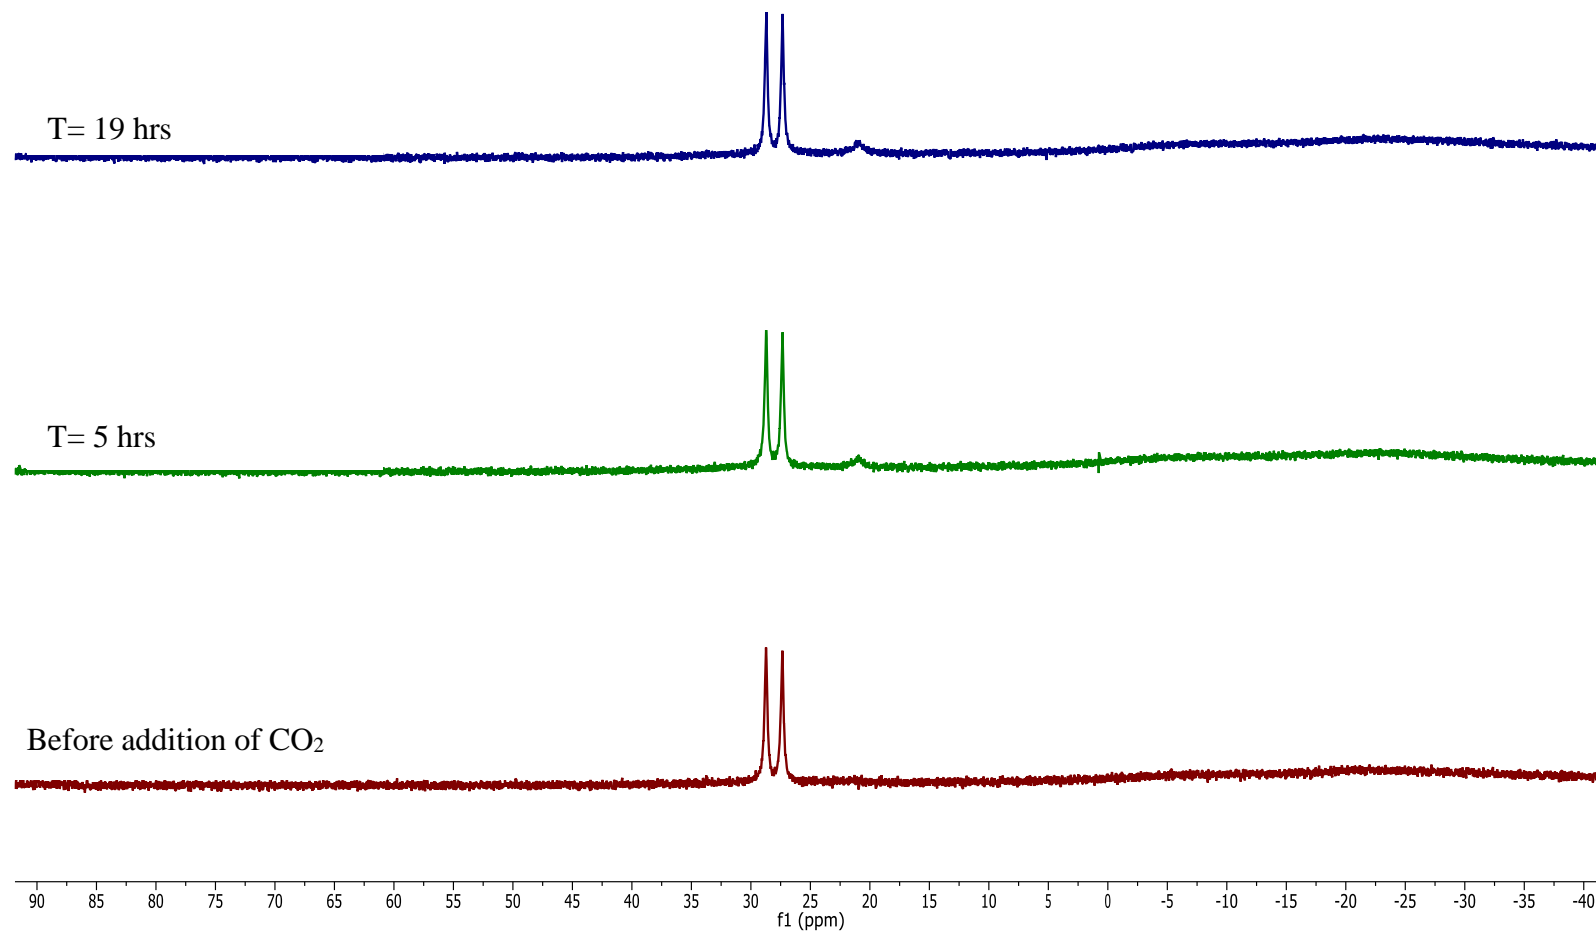

**Figure S 21**  $^{11}\text{B}$  NMR spectra for hydroboration of  $\text{CO}_2$  with 1 mol %  $\text{Co}(\text{acac})_3$ , 1 mol %  $\text{NaHBet}_3$ , and HBPIn (0.1 mmol) at various time intervals in cyclohexane- $d_{12}$ .

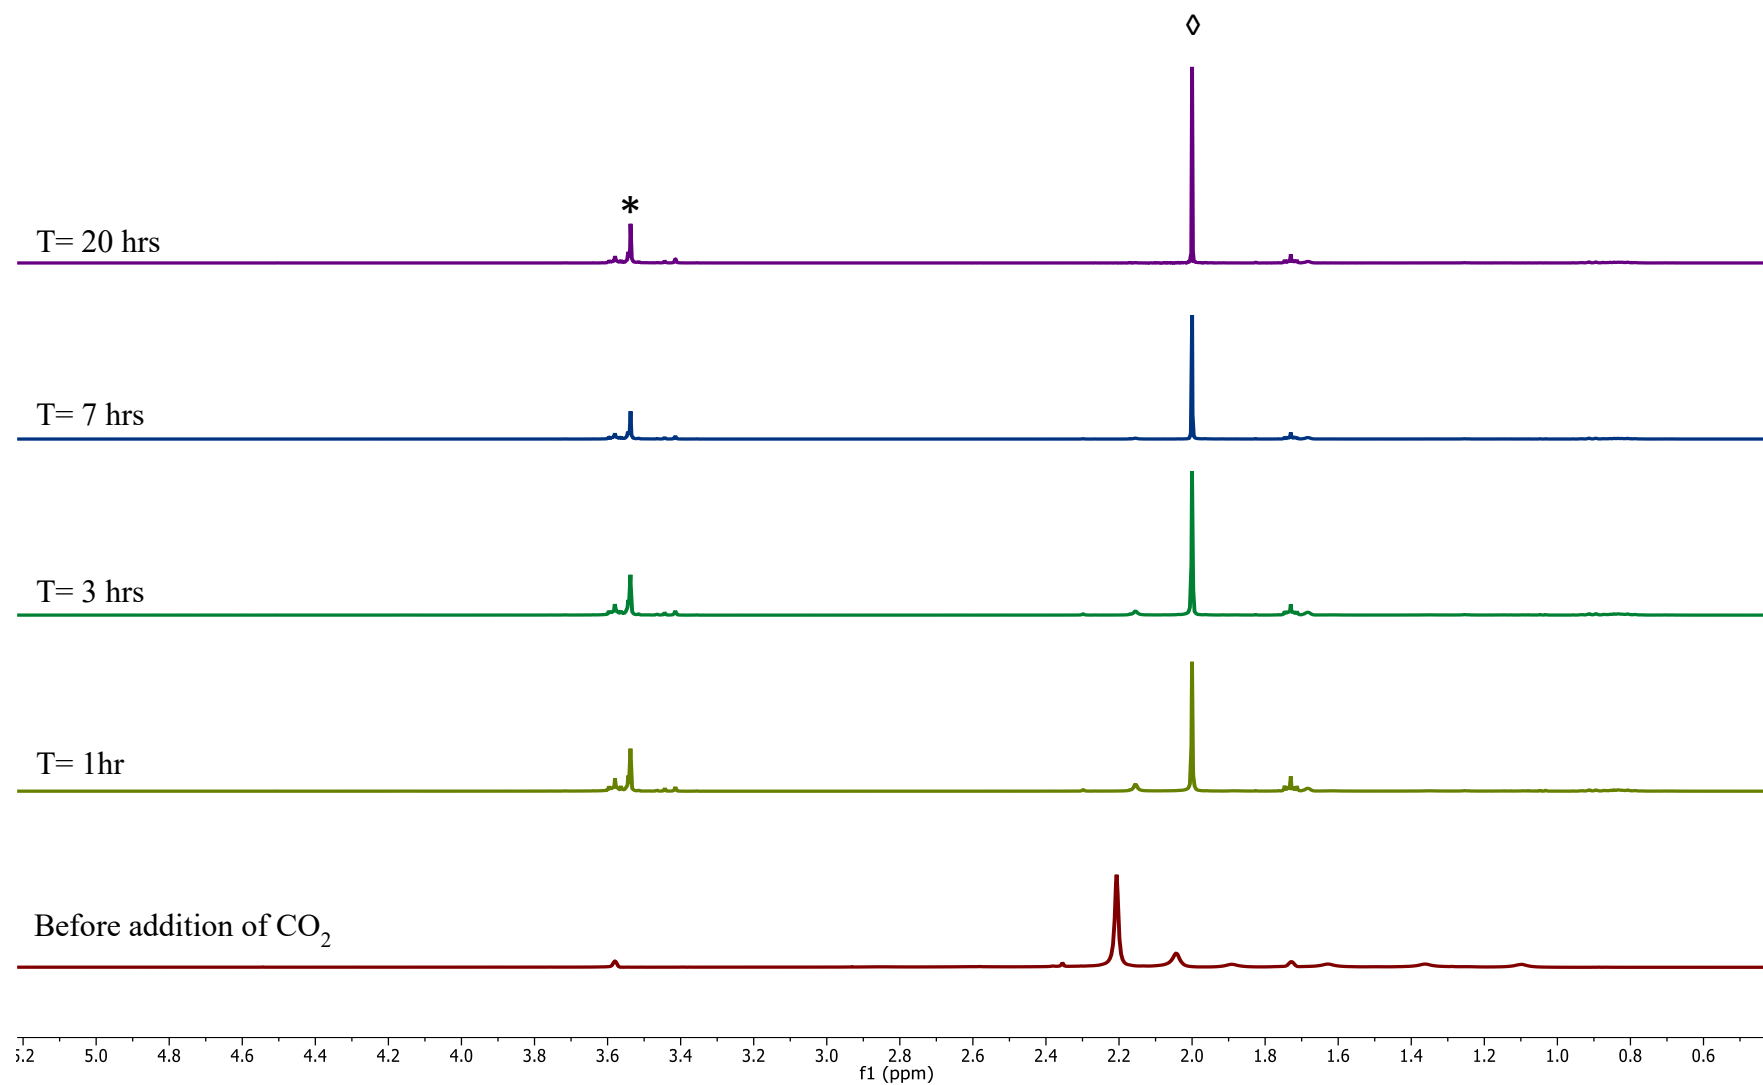

**Figure S 22**  $^1\text{H}$  NMR spectra for hydroboration of  $\text{CO}_2$  with 1 mol %  $\text{Co}(\text{acac})_3$ , 1 mol %  $\text{NaHBet}_3$ , and  $\text{BH}_3\cdot\text{S}(\text{Me})_2$  (0.1 mmol) at various time intervals in  $\text{THF-}d_8$ . The (\*) represents the  $^1\text{H}$  peak for  $(\text{CH}_3\text{OBO})_3$  at 3.54 ppm and ( $\diamond$ ) represents peak for free  $\text{S}(\text{Me})_2$  at 2.00 ppm.

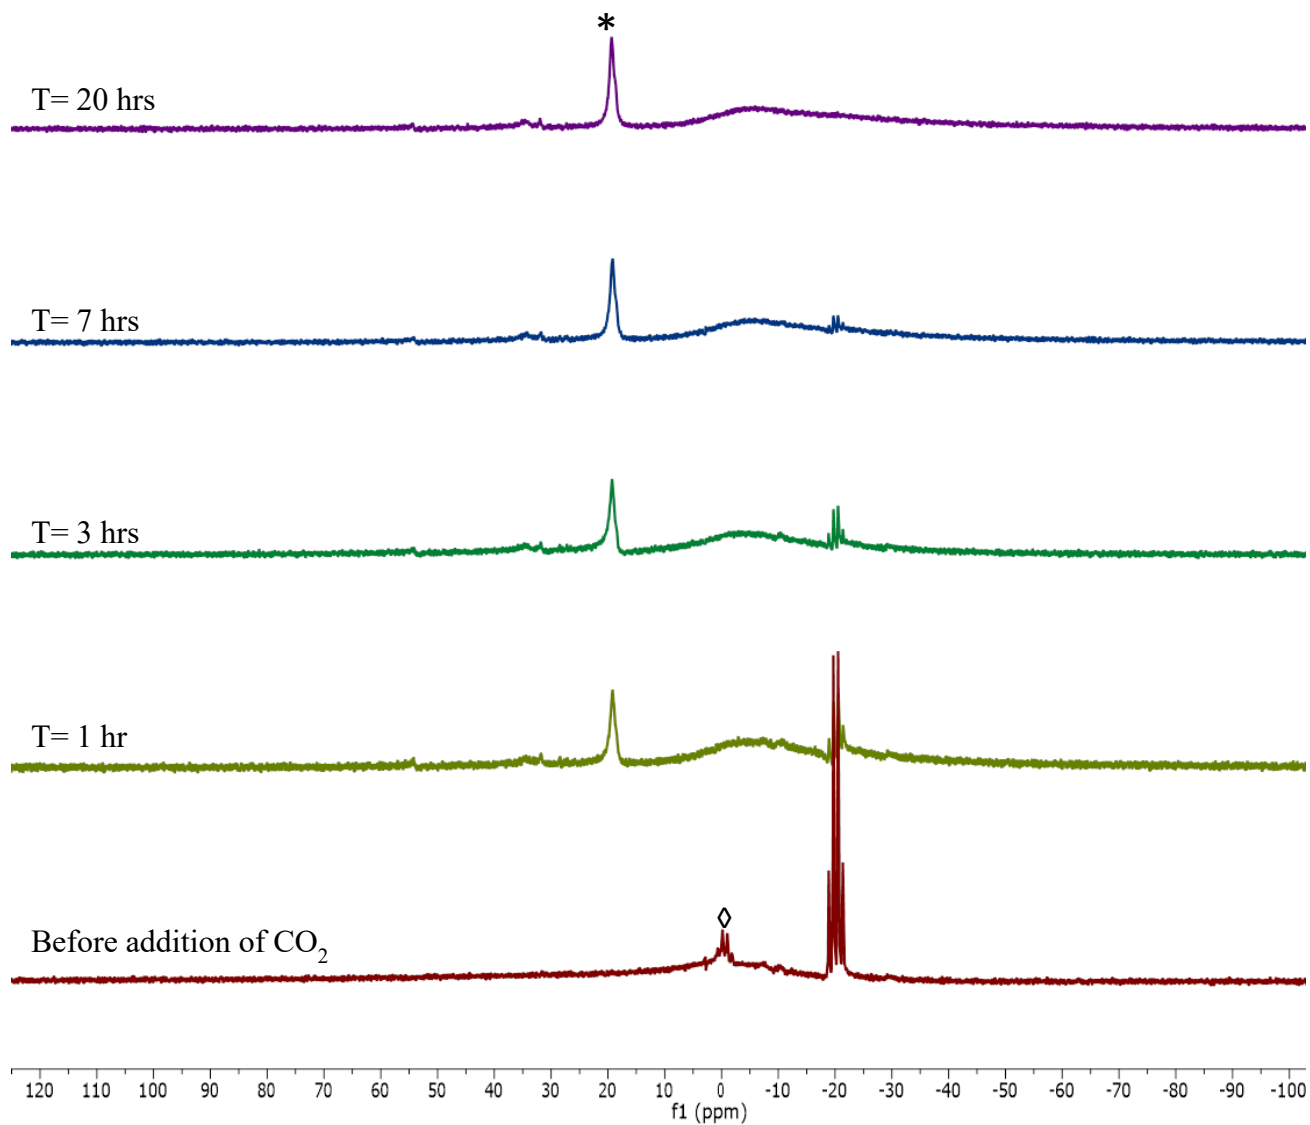

**Figure S 23**  $^{11}\text{B}$  NMR spectra for hydroboration of  $\text{CO}_2$  with 1 mol %  $\text{Co}(\text{acac})_3$ , 1 mol %  $\text{NaHBEt}_3$ , and  $\text{BH}_3\cdot\text{S}(\text{Me})_2$  (0.1 mmol) at various time intervals  $\text{THF-}d_8$ . The (\*) represents the  $^{11}\text{B}$  peak for  $(\text{CH}_3\text{OBO})_3$  at 19.3 ppm, and (◊) represents the peak for  $\text{BH}_3\cdot\text{THF}$  at -0.25 ppm.

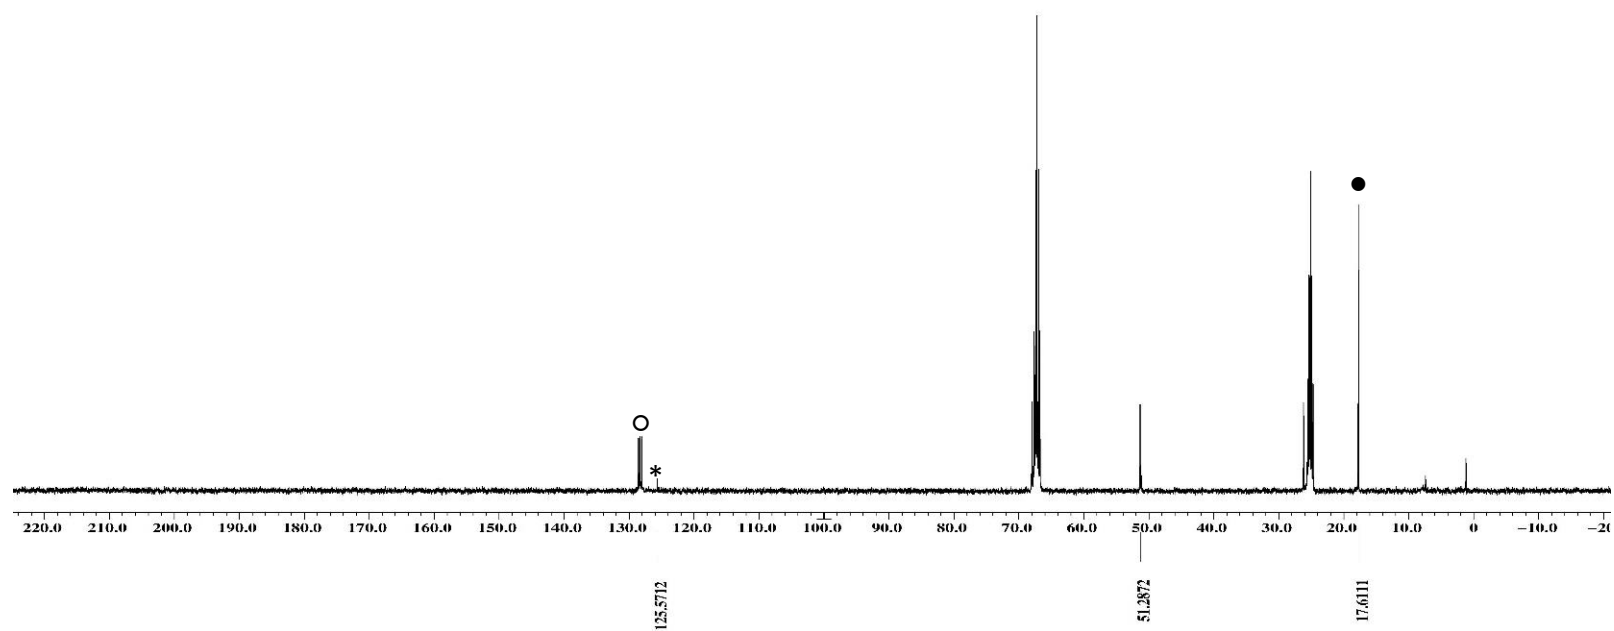

**Figure S 24**  $^{13}\text{C}$  NMR spectra after hydroboration of  $\text{CO}_2$  with 1 mol %  $\text{Co}(\text{acac})_3$ , 1 mol %  $\text{NaHBEt}_3$ , and  $\text{BH}_3\cdot\text{S}(\text{Me})_2$  (0.1 mmol) in  $\text{THF-}d_8$ . The ( $\diamond$ ) represents peak for  $(\text{CH}_3\text{OBO})_3$  at 51.3 ppm, ( $\bullet$ ) represents the peak for  $\text{S}(\text{Me})_2$  at 17.6 ppm, ( $\circ$ ) represents the peak for benzene- $d_6$  at 128.8 ppm, and (\*) represents the peak for  $\text{CO}_2$  at 125 ppm.

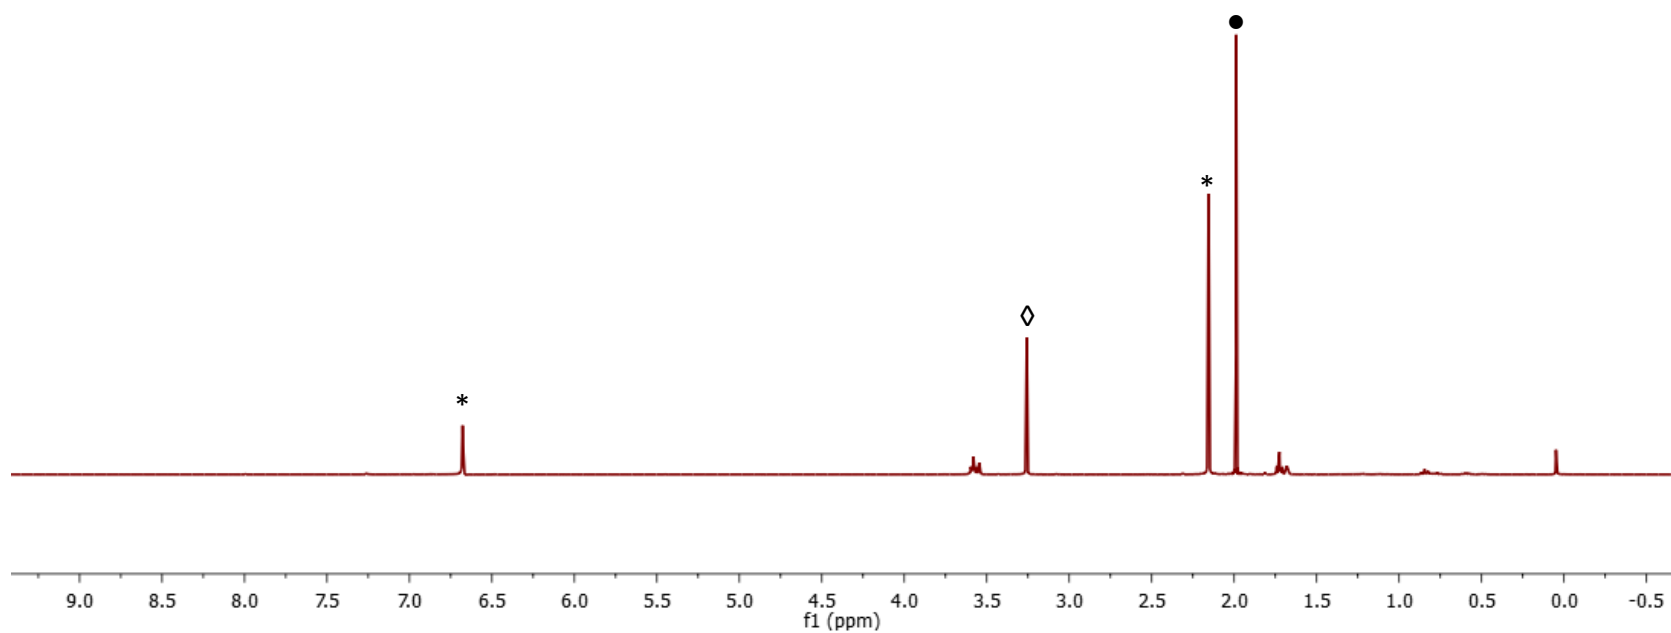

**Figure S 25** <sup>1</sup>H NMR spectra in THF-*d*<sub>8</sub> after hydrolysis with 50 μL of DCL in D<sub>2</sub>O. The (◊) represents the peak for CH<sub>3</sub>OD at 3.26 ppm, (●) represents the peak for S(Me)<sub>2</sub> at 1.99 ppm, and (\*) represents the peak for mesitylene at 2.16 ppm, and 6.67 ppm.

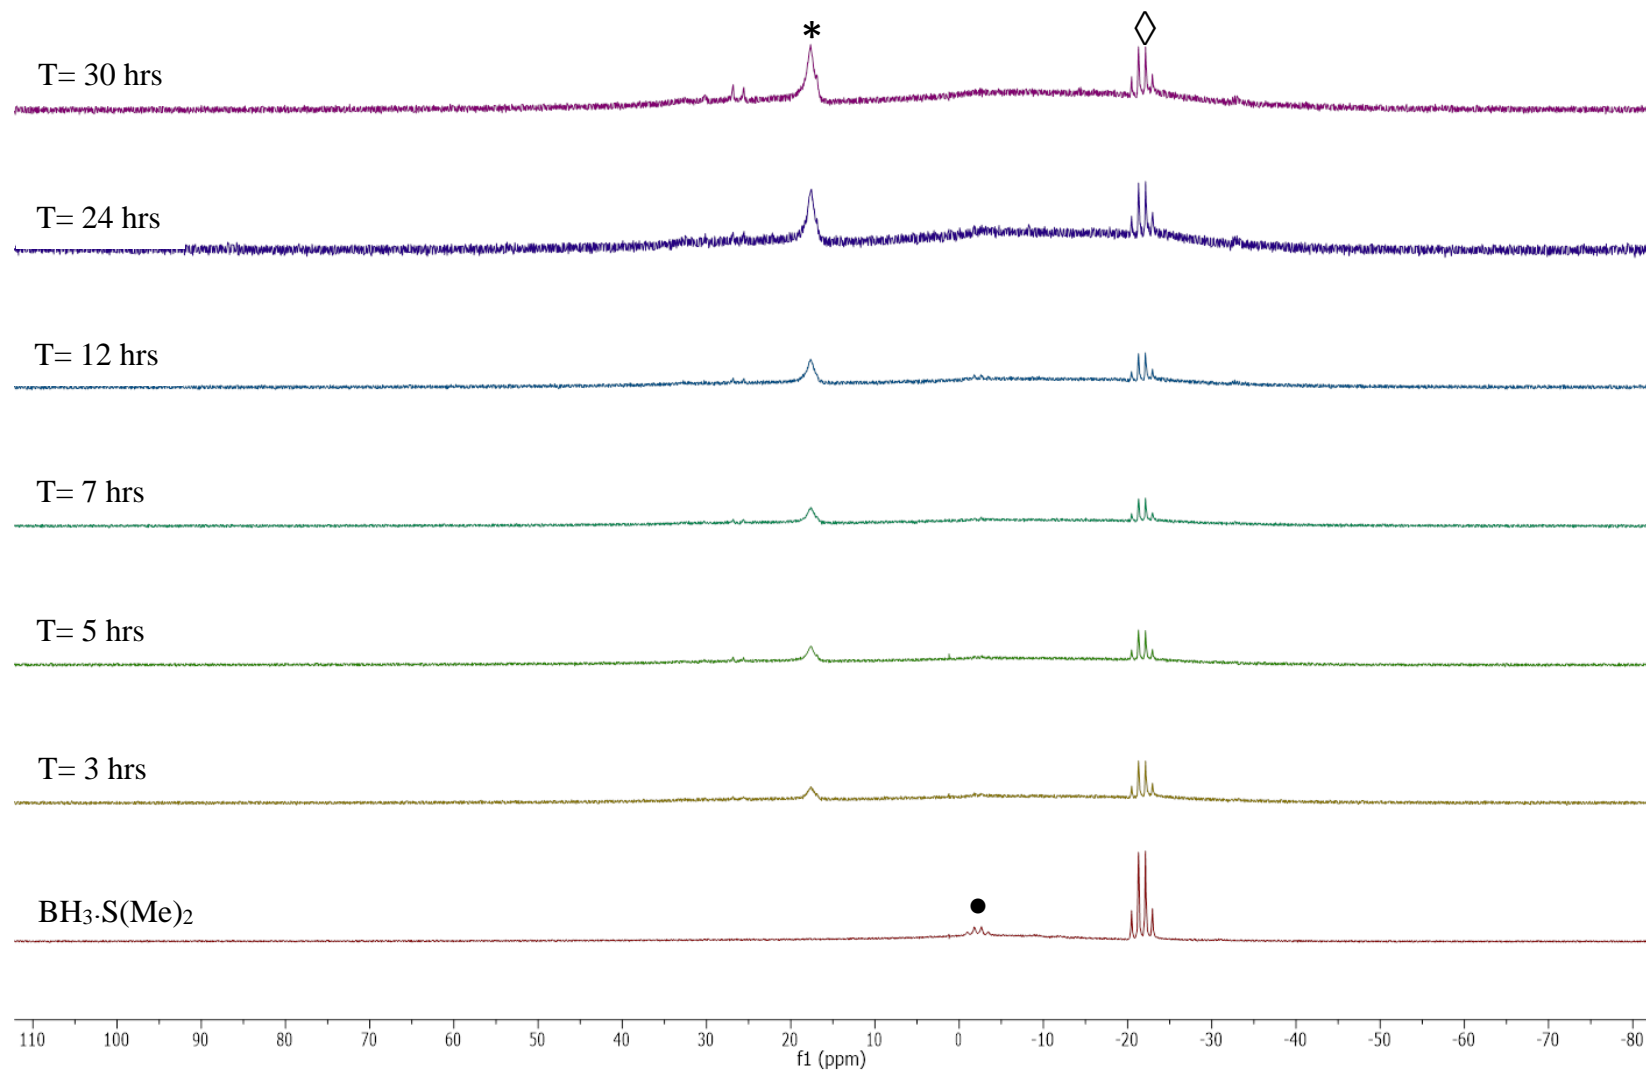

**Figure S 26**  $^{11}\text{B}$  NMR spectra for hydroboration of  $\text{CO}_2$  with 1 mol %  $\text{NaHBEt}_3$ , and  $\text{BH}_3\cdot\text{S}(\text{Me})_2$  (0.1 mmol) at various time intervals in THF. The (\*) represents the  $^{11}\text{B}$  peak for  $(\text{CH}_3\text{OBO})_3$  at 19.3 ppm, ( $\diamond$ ) represents the peak for unreacted  $\text{BH}_3\cdot\text{S}(\text{Me})_2$  at -21.3 ppm, and ( $\bullet$ ) represents the peak for  $\text{BH}_3\cdot\text{THF}$  at -0.25 ppm.

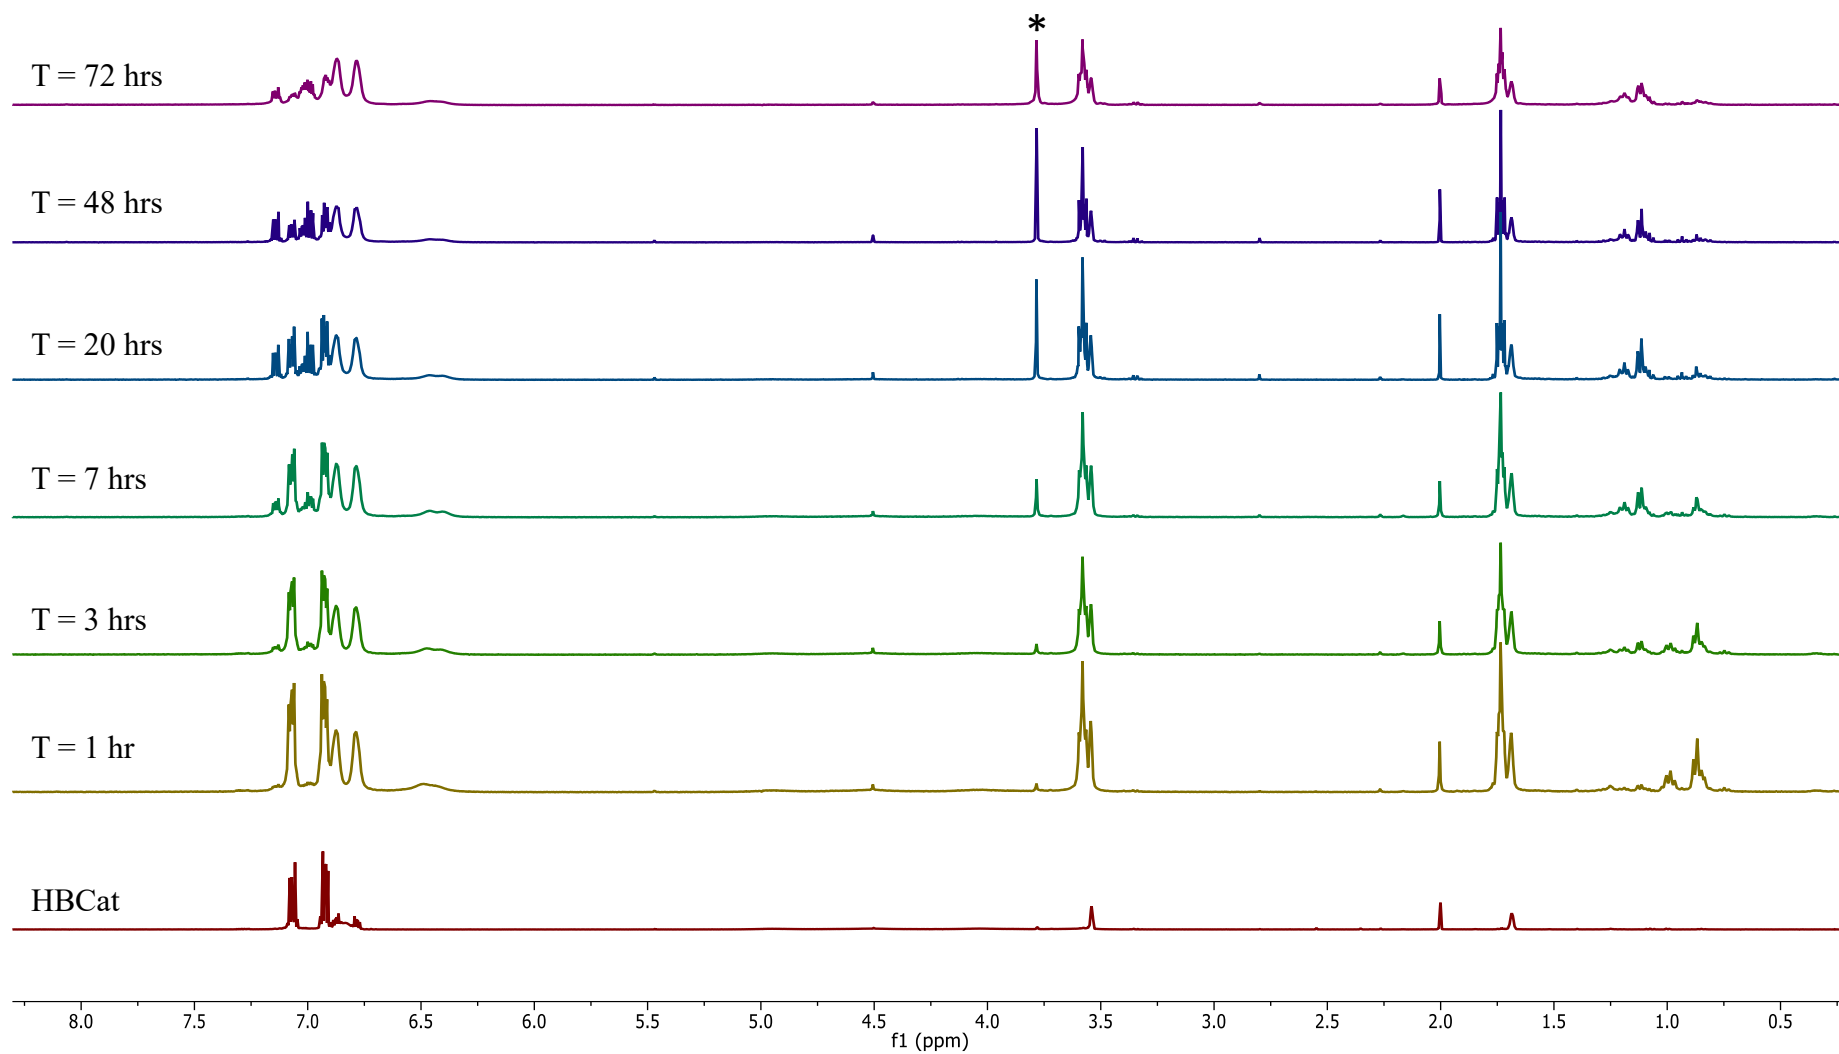

**Figure S 27** <sup>1</sup>H NMR spectra for hydroboration of CO<sub>2</sub> with 1 mol % Co(acac)<sub>3</sub>, 1 mol % NaHBEt<sub>3</sub>, and HBCat (0.1 mmol) at various time intervals in THF-*d*<sub>8</sub>. (\*) represents the <sup>1</sup>H peak for CH<sub>3</sub>OBCat at 3.78 ppm.

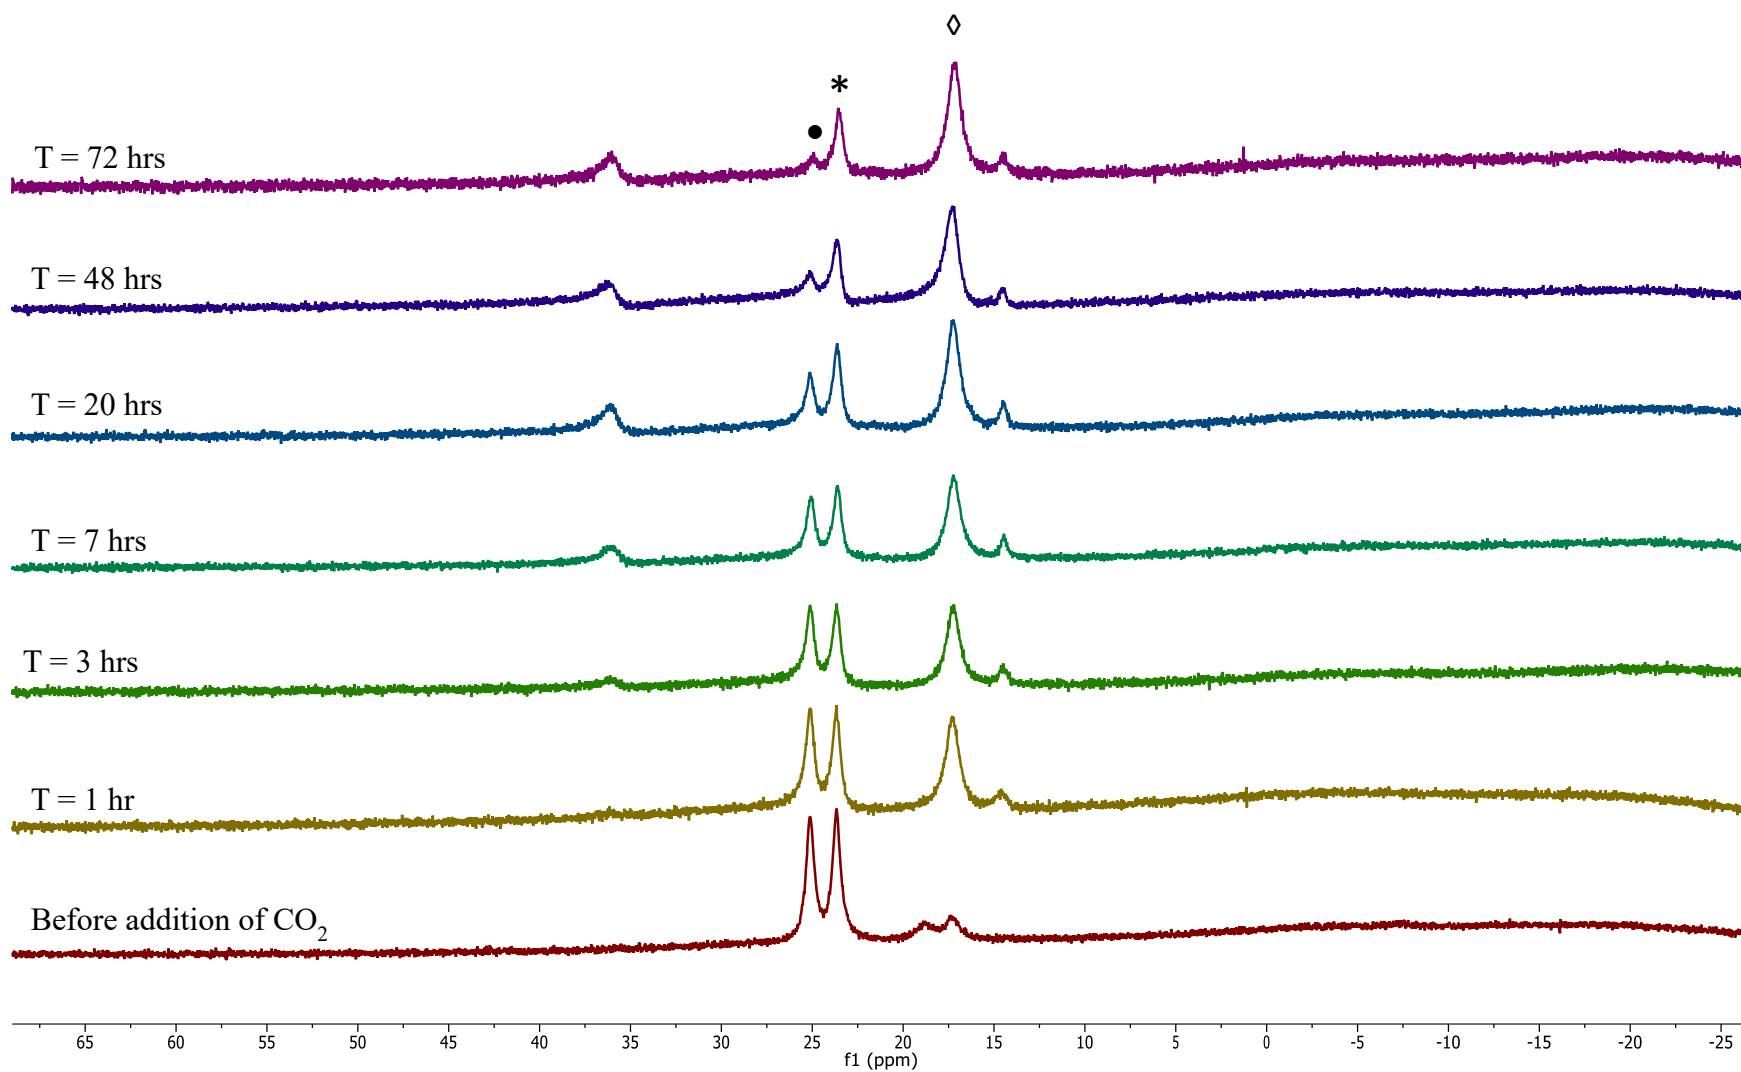

**Figure S 28**  $^{11}\text{B}$  NMR spectra for hydroboration of  $\text{CO}_2$  with 1 mol %  $\text{Co}(\text{acac})_3$ , 1 mol %  $\text{NaHBEt}_3$ , HBCat (0.1 mmol) and  $\text{CO}_2$  at various time intervals in  $\text{THF-}d_8$ . The (\*) represents the  $^{11}\text{B}$  peak for  $\text{CH}_3\text{OBCat}$  at 23.4ppm, (●) represents the peak for unreacted HBCat at 25.01ppm, and (◇) represents the peak for CatBOBCat at 17.1 ppm.



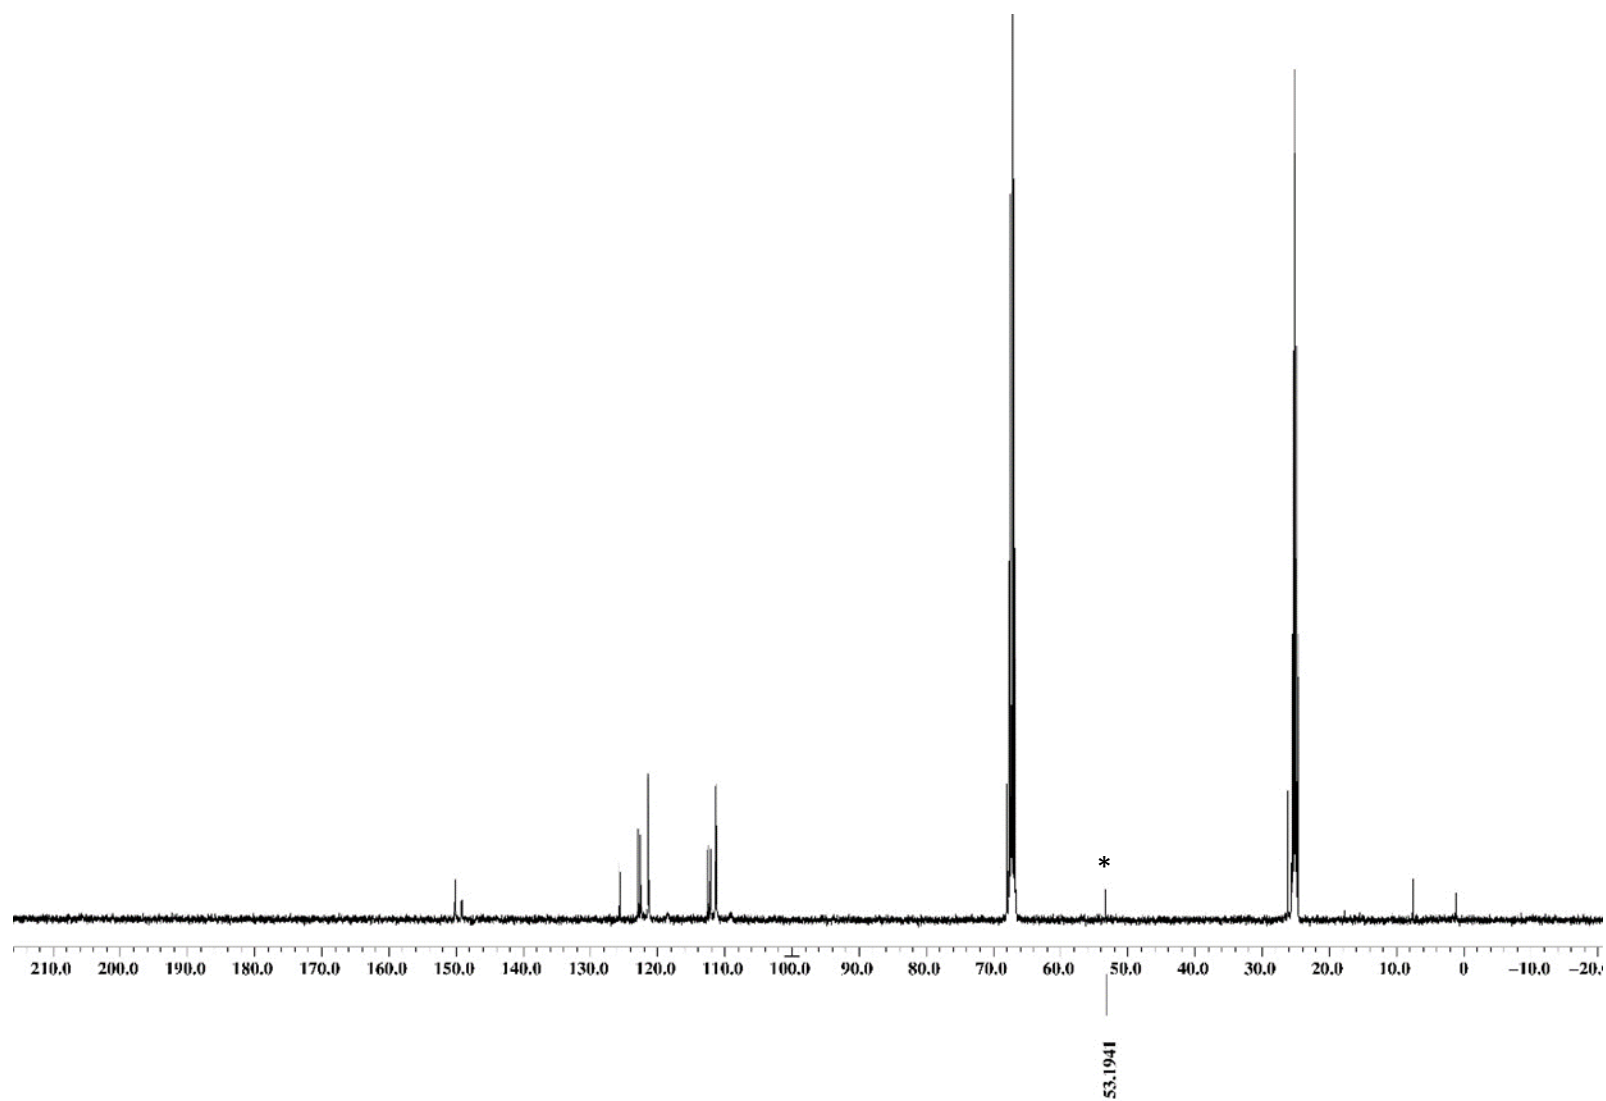

**Figure S 29**  $^{11}\text{B}$  NMR spectra for hydroboration of  $\text{CO}_2$  with 1 mol %  $\text{Co}(\text{acac})_3$ , 1 mol %  $\text{NaHBEt}_3$ , HBCat (0.1 mmol) and  $\text{CO}_2$  at various time intervals in  $\text{THF-}d_8$ . (\*) represents the  $^{13}\text{C}$  peak for  $\text{CH}_3\text{OBCat}$  at 53.2 ppm.

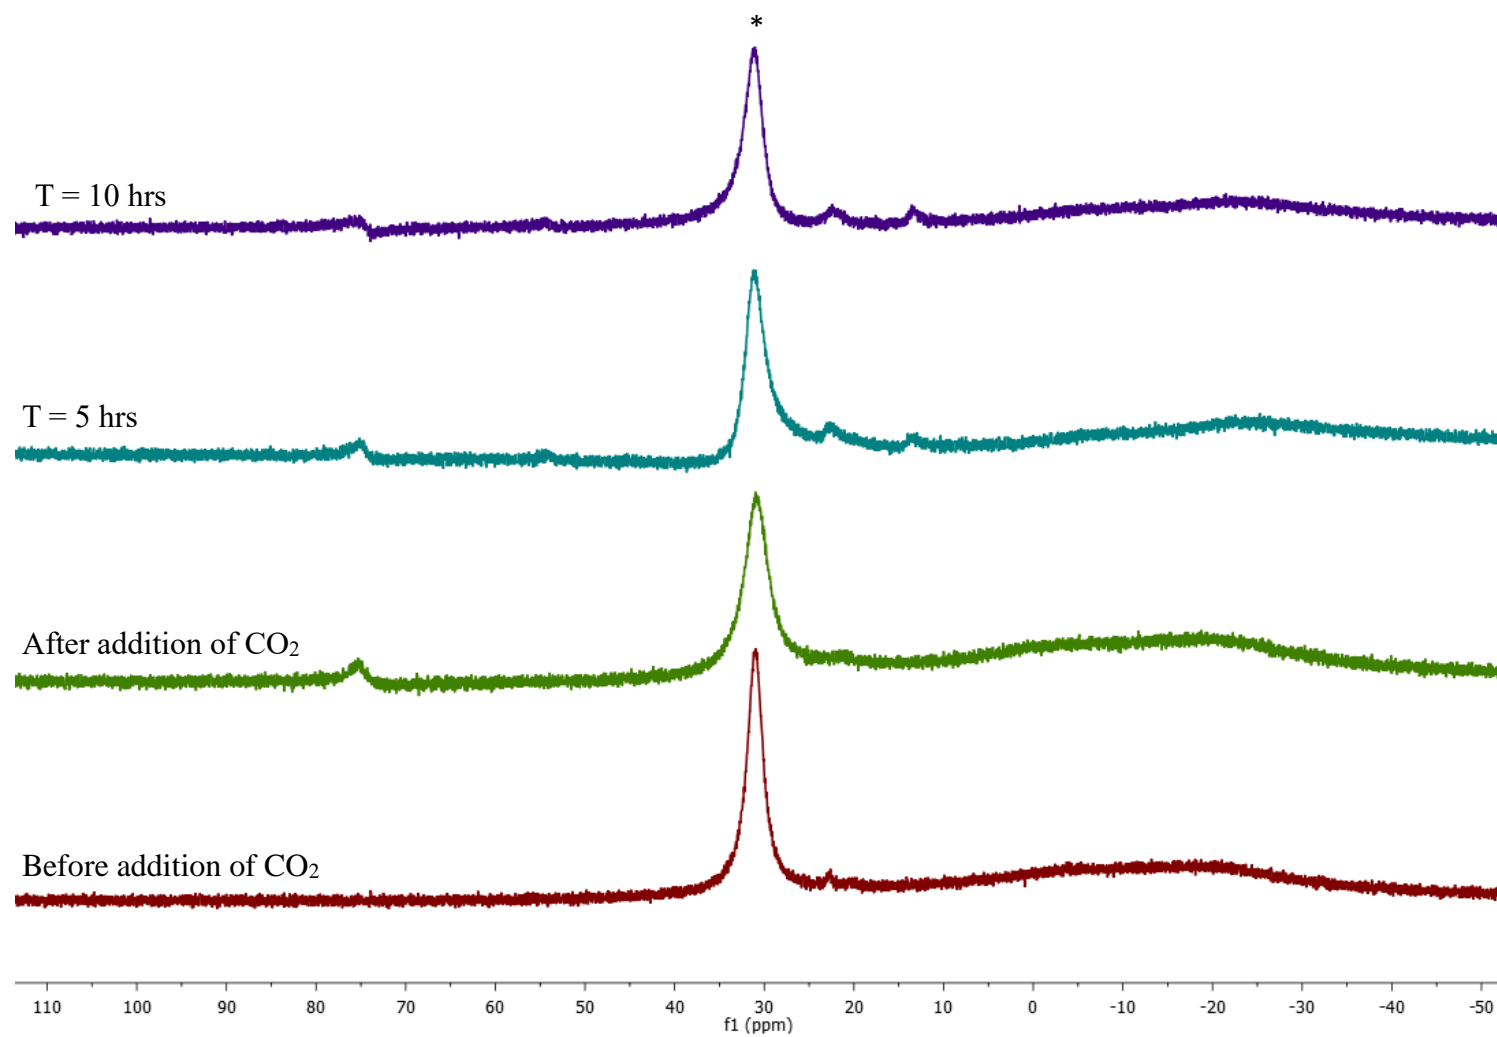

**Figure S 30**  $^{11}\text{B}$  NMR spectra for hydroboration of  $\text{CO}_2$  with 10 mol %  $\text{Co}(\text{acac})_3$ , 10 mol %  $\text{NaBHET}_3$ , and  $\text{B}_2\text{Pin}_2$  (1.0 mmol) at various time intervals in THF. (\*) represents the  $^{11}\text{B}$  peak for  $\text{B}_2\text{Pin}_2$  at 30.2 ppm.
